1                   **Prophylactic inhibition of colonization by *Streptococcus pneumoniae* with**  
2                   **the secondary bile acid metabolite deoxycholic acid**

3  
4  
5   Jorge E. Vidal<sup>1,#</sup>, Meagan N. Wier<sup>1</sup>, Uriel Angulo-Zamudio<sup>2</sup>, Erin McDevitt<sup>1</sup>, Ana G. Jop Vidal<sup>1</sup>, Babek  
6           Alibayov<sup>1</sup>, Anna Scasny<sup>1</sup>, Sandy M. Wong<sup>1</sup>, Brian J. Akerley<sup>1</sup>, and Larry S. McDaniel<sup>1</sup>

7  
8  
9           <sup>1</sup>Department of Microbiology and Immunology, University of Mississippi Medical Center, Jackson,  
10           MS, USA. <sup>2</sup>University of Sinaloa School of Medicine, Culiacan Sinaloa, Mexico

11  
12  
13   Running title: Eradication of Spn from the nasopharynx with DoC

14  
15  
16   Address correspondence to:

17   Jorge E. Vidal, PhD. Department of Microbiology and Immunology, University of Mississippi Medical  
18   Center. 2500 North State St, Jackson MS 39216

19 **Abstract**

20 *Streptococcus pneumoniae* (Spn) colonizes the nasopharynx of children and the elderly but  
21 also kills millions worldwide yearly. The secondary bile acid metabolite, deoxycholic acid (DoC),  
22 affects the viability of human pathogens but also plays multiple roles in host physiology. We  
23 assessed *in vitro* the antimicrobial activity of DoC and investigated its potential to eradicate Spn  
24 colonization using an *ex vivo* model of human nasopharyngeal colonization and an *in vivo* mouse  
25 model of colonization. At a physiological concentration DoC (0.5 mg/ml; 1.27 mM) killed all tested  
26 Spn strains (N=48) two h post-inoculation. The *ex-vivo* model of nasopharyngeal colonization  
27 showed that DoC eradicated colonization by Spn strains as soon as 10 min post-exposure. The  
28 mechanism of action did not involve activation of autolysis since the autolysis-defective double  
29 mutants  $\Delta lytA\Delta lytC$  and  $\Delta spxB\Delta lctO$  were as susceptible to DoC as was the wild-type (WT). Oral  
30 streptococcal species (N=20), however, were not susceptible to DoC (0.5 mg/ml). Unlike  
31 trimethoprim, whose spontaneous resistance frequency (srF) for TIGR4 or EF3030 was  $\geq 1 \times 10^{-9}$ , no  
32 spontaneous resistance was observed with DoC (srF  $\geq 1 \times 10^{-12}$ ). Finally, the efficacy of DoC to  
33 eradicate Spn colonization was assessed *in vivo* using a topical route via intranasal (i.n.)  
34 administration and as a prophylactic treatment. Mice challenged with Spn EF3030 carried a median  
35 of  $4.05 \times 10^5$  cfu/ml four days post-inoculation compared to  $6.67 \times 10^4$  cfu/ml for mice treated with  
36 DoC. Mice in the prophylactic group had a ~99% reduction of the pneumococcal density (median,  
37  $2.61 \times 10^3$  cfu/ml). Thus, DoC, an endogenous human bile salt, has therapeutic potential against Spn.

38

39

## 40 **Introduction**

41 *Streptococcus pneumoniae* (Spn) colonizes millions worldwide yearly, with a colonization  
42 prevalence particularly high in children and the elderly (1-3). In children, the prevalence of  
43 pneumococcal carriage can be as high as 90% in those from developing countries, or between 25-  
44 40% in children from industrialized nations (1, 4-7). There are also certain populations within  
45 developed countries with increased carriage rates. For example, in a study by Sutcliffe et al (2019)  
46 73.5% of children less than five, living in the US but of the Navajo nation, carried the pneumococcus  
47 in the upper airways (8). Along the same lines, carriage of Spn in adults 18-49.9 years of age can be  
48 as high as 50% (8, 9) while pneumococcal carriage in a more vulnerable population, those older than  
49 60, is similar (10) but increases in individuals colonized by the influenza virus (5). Although it is early  
50 to draw conclusions, pneumococcal carriage is expected to increase in individuals colonized with  
51 SARS-CoV-2 whereby we may experience a surge of pneumococcal disease (PD) cases in the next  
52 few years (11).

53 Pneumococcal carriage is a risk for developing PD and therefore it is considered an  
54 immediate and necessary precursor of PD (1, 2, 12, 13). An important intervention with a  
55 demonstrated positive impact on Spn carriage has been vaccination (14). Pneumococcal conjugated  
56 vaccines (PCV) were introduced in many parts of the world since 2001 when PCV7 was licensed in  
57 the US (15, 16). The introduction of these vaccines reduced the burden of PD caused by vaccine  
58 serotypes on a global scale and has also decreased nasopharyngeal carriage of pneumococcal  
59 vaccine types in vaccinated populations (14, 17). However, the overall carriage prevalence has not  
60 changed because of a phenomenon called “serotype replacement”, i.e., vaccine-escape strains have  
61 replaced vaccine type (VT) strains in the nasopharynx, resulting in pneumococcal carriage rates

62 similar to those observed prior to the introduction of vaccines (18-20). Therefore, additional  
63 interventions, or prophylactic strategies, are needed to aid reduce the burden of colonization.

64 Pathogenic and normal flora bacteria are susceptible to bile from different mammals (21-23).  
65 Recent studies have demonstrated that the lack of primary and secondary bile acid metabolites is  
66 implicated in the development of intestinal infectious disease (21-23). Bile consists of ~95% water in  
67 which are dissolved a number of endogenous solid constituents including bile salts, bilirubin  
68 phospholipid, cholesterol, amino acids, steroids, enzymes, porphyrins, vitamins, and heavy metals  
69 (24). Bile salts are the major organic solutes in bile and normally function to emulsify dietary fats  
70 and facilitate their intestinal absorption. The two main primary bile salts that are synthesized in the  
71 mammalian liver are cholic acid, and chenodeoxycholic acid (24, 25). Intestinal bacteria then  
72 produce “secondary bile acids” through enzymatic reactions, with the addition of two hydroxyl  
73 groups to cholic acid producing one of the most abundant secondary metabolites, deoxycholic acid  
74 (DoC) (24, 26). Endogenously-produced, secondary bile acids, have widespread effects on the host  
75 and resident microbiota and have therefore been used to treat different diseases (26). Cholic acid is  
76 used to treat patients with genetic deficiencies in the synthesis of bile acids due to single enzyme  
77 deficiencies; the typical dose is 10 to 15 mg/kg once daily (27). DoC has been utilized in humans at a  
78 concentration of 15 mg/kg/day to decrease plasma high-density lipoprotein (HDL)-cholesterol and  
79 low-density lipoprotein (LDL)-cholesterol (27) and it is also FDA-approved to reduce fat deposits (28,  
80 29).

81 In addition to their physiological role in digesting lipids, bile acids are important regulators of  
82 intestinal homeostasis by activating receptors on intestinal cells and stimulating the immune  
83 response (25). In germ-free mice or mice treated with antibiotics to deplete the intestinal bacterial  
84 flora, the lack of secondary bile acids caused a deficient TLR7-MyD88 signaling in plasmacytoid

85 dendritic cells that resulted in an increased susceptibility to systemic chikungunya infection (21).  
86 Another secondary bile acid, ursodeoxycholic acid, inhibited *in vitro* toxin production, growth and  
87 spore germination of *Clostridiodes difficile* strains and contributed to colonization resistance in an *in*  
88 *vivo* mouse model of *C. difficile* disease (CDI) (30). Administration of clindamycin reduced intestinal  
89 levels of valerate and DoC, increasing viable counts of *C. difficile* in a CDI chemostat infection model  
90 (31). A similar treatment of mice with clindamycin caused decreased intestinal DoC leading to  
91 increased *Campylobacter jejuni*-induced colitis (22). The growth of another intestinal pathogen,  
92 *Clostridium perfringens*, was inhibited *in vitro* with as low as 50  $\mu$ M of DoC. Using an animal model  
93 of necrotic enteritis (NE), and supplementation of DoC in the diet (e.g., 1.5 g/kg) decreased  
94 intestinal inflammation and NE-associated intestinal cell death and apoptosis (23).

95 *In vitro* studies demonstrated synergistic antibiotic activity when Doc (2.5 mg/ml) was  
96 combined with vancomycin, or with vancomycin and furazolidone, to treat clinically-important  
97 antibiotic resistant pathogens (32). Synergism between DoC, or lithocholic acid, and tryptophan-  
98 derived antibiotics secreted by intestinal bacteria inhibited bacterial division of *C. difficile* strains  
99 (33). In this study we assessed the antimicrobial activity of DoC against a collection of Spn strains,  
100 including reference strains, Spn isolated from cases of pneumococcal disease, and strains resistant  
101 to multiple antibiotics. The mechanistic basis for the observed sensitivity to DoC was investigated  
102 using knockout mutants in different autolytic mechanisms. We also adapted an *ex vivo* model of  
103 nasopharyngeal colonization to investigate the efficacy of DoC to eradicate Spn colonization and  
104 finally developed an *in vivo* prophylactic mouse model to demonstrate that administration of DoC  
105 prevented Spn colonization.

106

107 **Results**

108 **Deoxycholic acid (DoC) eradicates cultures of drug-resistant *S. pneumoniae*.** We challenged  
109 reference strains D39 and TIGR4 and drug-resistant Spn 19A and 19F vaccine-serotypes strains with  
110 increasing dosages of DoC and incubated for 2 h. Whereas untreated bacteria grew at  $>10^8$  cfu/ml,  
111 all five pneumococcal strains treated with DoC were killed within 2 h with 0.5 mg/ml (1.27 mM).  
112 Except for strain D39, all other vaccine serotype Spn strains were also killed with 250  $\mu$ g/ml of DoC  
113 (Fig. 1).

114 We then assess the antimicrobial efficacy of DoC (0.5 mg/ml) against 39 pneumococcal  
115 strains isolated from cases of pneumococcal disease. Strains represented all PCV13 vaccine  
116 serotypes, and at least two strains of each vaccine serotype were challenged. Supplemental Table 1  
117 confirmed that 0.5 mg/ml (1.27 mM) of DoC incubated for 2 h killed all assessed Spn strains. A MIC<sub>90</sub>  
118 of 0.5 mg/ml DoC was established.

119 A similar MIC [0.5 mg/ml (1.27 mM)] was obtained with reference strain TIGR4, or EF3030,  
120 assessed in cation-activated Mueller-Hinton broth (CAMHB) with 3% of lysed horse blood (LHB) and  
121 according to CLSI guidelines to assess resistance (34), or non-susceptibility, of Spn strains  
122 (Supplemental Fig. 1 and not shown). Whereas the density of TIGR4 inoculated in CAMHB and  
123 incubated overnight reached a density of  $6.7 \times 10^{10}$  cfu/ml, those cultures treated with DoC (1.27  
124 mM) had a median density of  $1.2 \times 10^4$  cfu/ml, a ~99.99% reduction in density after overnight  
125 incubation (Supplemental Fig. 1).

126

127 **DoC eradicates MDR *S. pneumoniae* colonization in an *ex-vivo* model with human pharyngeal**  
128 **cells.** To assess the potential of DoC to eradicate pneumococcal colonization, we performed  
129 experiments using an *ex-vivo* model of colonization. To create an abiotic substrate for pneumococci  
130 to colonize we used polarized human pharyngeal cells that had been fixed with paraformaldehyde.

131 These cell monolayers were infected with a MDR Spn strain GA47281, a vaccine strain serotype 19F  
132 bearing resistance to several antibiotics including erythromycin, meropenem, and cefuroxime.  
133 Infected human cells were incubated for 4 h to allow attachment of Spn and then planktonic  
134 bacteria were removed. Spn-colonized human cells were left untreated or challenged with different  
135 dosages of DoC and incubated for 2 h. All doses of DoC reduced the density of MDR pneumococci  
136 >90% after the 2 h incubation compared to untreated human pharyngeal cells which had a density  
137 of  $\sim 1 \times 10^7$  cfu/ml of pneumococci (Fig. 2A). GA47281 bacteria were not recovered when  
138 pneumococci were treated with 0.5 mg/ml (1.27 mM). Confocal scanning laser microscopy, XY  
139 optical sections and 3D reconstructions, of cells infected with Spn confirmed that DoC had  
140 eradicated colonization by strain GA47281 (Fig. 2C) or colonization by strain TIGR4 (Fig. 2D) from  
141 human pharyngeal cells.

142 To determine the exposure time required to kill pneumococci, we performed a time course  
143 study treating MDR pneumococci colonizing human pharyngeal cells for up to one h with 0.5 mg/ml  
144 (1.27 mM). Interestingly, a ten-minute exposure time was enough to kill most attached MDR  
145 pneumococci (Fig. 2B). The antimicrobial effect did not change with a longer exposure time of 60  
146 min. These data indicate that 0.5 mg/ml (1.27 mM) of DoC rapidly eradicates MDR pneumococci  
147 that otherwise would have colonized human nasopharyngeal cells at a density  $\sim 10^7$  cfu/ml (Fig. 2B).

148

149 **Spontaneous resistance to DoC (500  $\mu$ g/ml) was not developed by *S. pneumoniae* strains.** Spn  
150 strains develop spontaneous resistance to some antibiotics at a spontaneous mutation frequency  
151  $> 1 \times 10^{-8}$  (35). We assessed spontaneous resistance to DoC using antibiotic sensitive strains TIGR4 and  
152 EF3030. As expected, spontaneous resistance against trimethoprim developed at a frequency of  
153  $\geq 1.39 \times 10^{-9}$  when either pneumococcal strain was assessed (Fig. 3). Spontaneous resistance to DoC,

154 however, was not observed in any of the two strains tested even at a population density  $>10^{12}$   
155 cfu/ml (Fig. 3).

156

157 **The mechanism of DoC-killing does not appear to trigger autolysis.** Since the above experiments  
158 revealed that a short exposure time was sufficient to kill pneumococci, we hypothesized that an  
159 irreversible autolytic mechanism may have been triggered by DoC. Autolysis is mainly driven by  
160 autolysins LytA and LytC (36, 37) but hydrogen peroxide produced by the pneumococcus, through  
161 enzymes SpxB and LctO, also contributes to lysis of pneumococci (38-40). To assess this hypothesis,  
162 we utilized strain R6 wt, its isogenic  $R6\Delta lytA\Delta lytC$  mutant and a double  $R6\Delta spxB\Delta lctO$  mutant to  
163 assess the role of autolysis in the observed DoC-mediated bactericidal activity. Since autolysis can be  
164 measured by quantifying the release of extracellular (e)DNA, we first confirmed that the absence of  
165 the LytA and LytC autolysins, or SpxB and LctO, causes a decreased release of eDNA into the  
166 supernatant. After four hours of incubation, the eDNA released by R6 wt strain reached a median of  
167  $2.24 \times 10^6$  pg/ml, whereas  $R6\Delta spxB\Delta lctO$  released a statistically different two-fold decreased amount  
168 of eDNA (median,  $1.09 \times 10^6$  pg/ml) in the supernatant (Fig. 4A). As expected, the autolysin double  
169 mutant  $R6\Delta lytA\Delta lytC$  yielded a ~14-fold reduced amount of eDNA (median,  $1.55 \times 10^5$  pg/ml) (Fig.  
170 4A) compared to R6 wt.

171 These two mutant strains with an impaired autolysis phenotype were then challenged with  
172 DoC [0.5 mg/ml (1.27 mM)] and treated and untreated bacteria were incubated for 1 h. Results in  
173 Fig. 4B showed a >90% significant reduction (i.e., killing) of the population of R6 pneumococci after 1  
174 h of incubation. The density of the  $R6\Delta spxB\Delta lctO$  isogenic mutant (not shown) or the  $R6\Delta lytA\Delta lytC$   
175 mutant (Fig. 4B) was similarly reduced after 1 h incubation period with DoC, indicating that the  
176 mechanism by which DoC kill pneumococci is not by triggering autolysis.



177

178 **DoC does not affect viability of normal flora streptococci.** We next investigated whether the MIC<sub>90</sub>  
179 of DoC that eradicates Spn strains [0.5 mg/ml (1.27 mM)] within 2 h of incubation would have the  
180 same bactericidal effect against other streptococci that reside in the oral cavity. As a positive control  
181 we utilized Spn reference strain EF3030 (41, 42). The median density of EF3030 untreated cultures  
182 was  $3.37 \times 10^7$  cfu/ml whereas those treated with 0.5 mg/ml DoC for 2 h had a median density of  
183  $3.1 \times 10^2$  cfu/ml, and therefore DoC killed 99.99% of the bacterial population (Fig. 5A). However, the  
184 same dose of DoC incubated for 2 h did not significantly affect the viability of *S. oralis* (Fig. 5B), *S.*  
185 *mutans*, (Fig. 5C) *S. gordonii*, (Fig. 5D) and induced a two-log reduction of the density of *S.*  
186 *anginosus*. (Fig. 5E). An additional 16 different streptococcal species were treated with DoC [0.5  
187 mg/ml (1.27 mM)] for two hours and, except for *S. pseudopneumoniae* and *S. salivarius* that were  
188 susceptible, cultures of all other species were not affected (Table 1).

189

190 **Standardizing the mouse model of pneumococcal carriage to assess the efficacy of DoC to**  
191 **eradicate nasopharyngeal colonization.** The bacterial inoculum utilized in a mouse model of  
192 pneumococcal colonization is usually  $\sim 1 \times 10^7$  cfu and nasal washes through the trachea are  
193 performed to assess colonization (43, 44). We first standardized the removal of a defined section of  
194 nasopharyngeal tissue consisting of the intact nasal septum (Fig. 6A) from colonized mice and  
195 confirmed by histological analysis the presence of typical nasopharyngeal tissue including microvilli,  
196 and pseudostratified, squamous epithelium overlaying by loose connective tissue including blood  
197 vessels with erythrocytes (Fig. 6B). Since our goal was to assess the efficacy of DoC to reduce, and/or  
198 inhibits, nasopharyngeal colonization we investigated a low inoculum density of Spn EF3030 that  
199 would sustain colonization of mice, but avoided using a non-natural (i.e., heavy) inoculum. Our

200 experiments demonstrated that inoculating  $\sim 1 \times 10^5$  cfu in the nostrils of mice allowed  
201 nasopharyngeal colonization for up to four days at a median density of  $2.49 \times 10^5$  cfu/organ (Fig. 6D).  
202 We additionally removed the trachea and lungs and demonstrated consistent Spn colonization of  
203 the trachea, at a low density of  $9.0 \times 10^2$  cfu/organ, but colonization of the lungs was not observed  
204 (Fig. 6D). Encapsulated Spn were detected using an anti-S19-Alexa-555 antibody and were identified  
205 both in nasopharyngeal homogenates (Fig. 6C) and colonizing the nasopharyngeal tissue (Fig. 6E).  
206 Microinvasion into the nasopharyngeal epithelium was also observed (Fig. 6E).

207 **Deoxycholic acid (DoC) decreased *in vivo* colonization by *S. pneumoniae* strain EF3030 in a mouse**  
208 **model of nasopharyngeal carriage.** We then assessed the efficacy of DoC to eradicate colonization  
209 using three groups of mice (N=8). Groups 1 and 2 drank regular water while the drinking water of  
210 group 3 was supplemented with DoC at a concentration of 0.2  $\mu\text{g/ml}$  (i.e., 0.02%) six days prior to  
211 infection and remained in their drinking water throughout the experiment (Fig. 7A). All three groups  
212 were then challenged i.n. with Spn EF3030 ( $\sim 1 \times 10^5$  cfu) and 24 h post-infection, mice in groups 1 and  
213 2 were treated twice a day i.n. with 10  $\mu\text{l}$  of a PBS solution or DoC (2 mg/ml), respectively. Mice  
214 were euthanized 10 days after initiating the prophylactic regimen (i.e., oral administration) in  
215 drinking water, or four days after placebo or DoC topical nasopharyngeal treatment began (Fig. 7A).

216 Because of the oral and topical administration of DoC, we monitored the weight of mice daily  
217 and no statistically significant difference in weight was observed between day one and the end of  
218 the experiment in groups 1, 2, and 3 (Fig. 7B). The colonization density of Spn was determined by  
219 dilution and plating of nasopharyngeal homogenates (Fig. 7C). The median density of Spn in the  
220 control group was  $4.05 \times 10^5$  cfu/ml (25<sup>th</sup> percentile,  $2.50 \times 10^4$ ; 75<sup>th</sup> percentile,  $5.60 \times 10^5$ ) whereas  
221 mice in the topical DoC-nostril group had a median density of  $6.67 \times 10^4$  cfu/ml (25<sup>th</sup> percentile, 1.15

222  $\times 10^5$ ; 75<sup>th</sup> percentile,  $5.94 \times 10^5$ ). Although slightly reduced compared with the control group, this  
223 colonization density was not statistically different. However, mice in the prophylactic DoC  
224 administration group had a median Spn density of  $2.61 \times 10^3$  cfu/ml (25<sup>th</sup> percentile,  $1.5 \times 10^3$ ; 75<sup>th</sup>  
225 percentile,  $2.03 \times 10^4$ ) and therefore, a significant reduction of nasopharyngeal colonization density  
226 (e.g., 99.36% reduction) was achieved compared to the control group. We further extracted DNA  
227 from those nasopharyngeal homogenates and the purified DNA was utilized as template in Spn-  
228 specific quantitative (q)PCR reactions. qPCR reactions confirmed a statistically significant decreased  
229 density in the oral administration DoC-water group (median,  $1.77 \times 10^4$  genome equivalents/ml)  
230 compared with the control group (media,  $6.70 \times 10^5$  genome equivalents/ml) or with the topical DoC-  
231 nostril group (media,  $1.15 \times 10^5$  genome equivalents/ml) (Fig. 7D).

232

## 233 **Discussion**

234 We demonstrated that the prophylactic treatment through the oral route with DoC  
235 protected mice from nasopharyngeal colonization with Spn strain EF3030. We also described in the  
236 current study a rapid antimicrobial effect of DoC against Spn strains, including reference strains,  
237 recent invasive isolates and multidrug resistant strains. DoC-susceptible strains included all PCV13  
238 serotypes, strains bearing resistance to first-line antibiotics utilized to treat pneumococcal disease  
239 such as beta-lactams and macrolides (45, 46), and last-resort antibiotics such as meropenem and  
240 linezolid. Killing of Spn occurred with 1.27 mM, which is below the upper physiological limit (i.e., 2  
241 mM) of free, unconjugated, bile acids in the intestine although the post-prandial concentration of  
242 conjugated bile acids can be as high as 10 mM (47, 48). Remarkably, oral administration of DoC  
243 during 10 days by supplementing the drinking water of mice with  $0.2 \mu\text{g/ml}$  ( $0.5 \mu\text{M}$ ), inhibited  
244 nasopharyngeal colonization reducing the pneumococcal density by ~99%. Since adult mice (20-25

245 g) drink a minimum of 3 ml of water per day (49), this oral administration via drinking water reached  
246 a dosage of ~0.6 mg/day (~24 mg/kg/day).

247 DoC is a secondary bile acid synthesized by the intestinal microbiota from cholic acid and  
248 then rapidly absorbed in the intestine (24, 26), thereby it is likely that the concentration of DoC in  
249 blood rapidly increased and stayed at similar levels throughout the prophylactic treatment. Whether  
250 the level of DoC in circulation directly caused the reduction of the colonization density by means of  
251 the DoC-antimicrobial activity, or by means of its immunomodulatory activities, is currently under  
252 investigation in our laboratories. Bile produced by mammals has bacteriostatic activity keeping the  
253 sterility of the biliary tree, thereby an imbalance in the synthesis of bile acids, among other negative  
254 effects, is associated with the overgrowth of bacteria in the small intestine and with inflammation  
255 (50). For example, when the intestinal DoC increases the synthesis and secretion of mucus increases  
256 and induces the synthesis of immunoregulatory cytokines including the release of human  $\beta$ -  
257 defensins (50-52).

258 DoC is the most abundant secondary bile acid in serum of both mice and humans, with  
259 concentrations in healthy subjects ranging from 100 nM to 1  $\mu$ M (53, 54). Individuals with  
260 deficiencies in bile salts have problems to emulsify fat leading to intestinal disorders that have been  
261 treated by manipulating intestinal levels of bile acids (51). Cholic acid is used to treat patients with  
262 genetic deficiencies in the synthesis of bile acids due to single enzyme deficiencies; the typical dose  
263 is 10 to 15 mg/kg once daily (27). Specifically, DoC has been utilized in humans at a concentration of  
264 15 mg/kg/day to decrease plasma high-density lipoprotein (HDL)-cholesterol and low-density  
265 lipoprotein (LDL)-cholesterol (27). Thus, the prophylactic dosage of oral DoC that inhibited *Spn*  
266 colonization in mice (24 mg/kg/day) was similar to that utilized to treat metabolic diseases in  
267 humans. More recent studies demonstrated that DoC (50-150  $\mu$ M) and ursodeoxycholic acid (UDA)

268 regulates colonic wound healing using a mouse model of colonic epithelial restitution *in vivo* by  
269 administering bile acids at a concentration of 30 mg/kg/day via rectal gavage (55). When  
270 administered to mice at a similar concentration, DoC and UDA prevented *C. jejuni*-induced colitis  
271 and CDI, respectively. Whereas DoC did not affect viability of *C. jejuni* strains but enhanced an  
272 immune response against the pathogen, UDA (3.8 mM) directly decreased the viability of *C. difficile*  
273 and directly inhibited sporulation.

274 Spn strains are “dissolved” in rabbit bile (56), and this is the basis of a phenotypic assay (i.e.,  
275 bile solubility test) utilized to differentiate Spn strains from other  $\alpha$ -hemolytic streptococci (57, 58).  
276 At a more physiological concentration, such as that utilized in the current study (1.27 mM), DoC  
277 specifically killed Spn strains but had little to no activity against other streptococci. Although the bile  
278 solubility test measures turbidity by a subjective visual method rather than viability, bile solubility of  
279 streptococci using a semi-quantitative assay correlated with our studies of bacterial viability after a  
280 challenge with DoC (59). Similar to our MIC studies, the semi-quantitative assay identified Spn  
281 strains having the highest solubility in bile followed by strains with intermediate solubility such as *S.*  
282 *pseudopneumoniae* but all other streptococci were not soluble in bile (59).

283 Reports describing Spn strains that were not soluble in DoC using the subjective visual  
284 readout are available; however, neither the semiquantitative assay nor our viability screening  
285 identified strains reduced in or lacking susceptibility to DoC (60). The possibility remains that some  
286 pneumococcal strains isolated from pneumococcal disease cases, or those colonizing healthy  
287 individuals, are naturally resistant to DoC. Spontaneous resistance to DoC when assessed using  
288 strains TIGR4 and EF3030 was not achieved even at bacterial populations  $>10^{12}$  cfu/ml. The same  
289 strains, when challenged with trimethoprim, generated spontaneous resistant bacteria at a  
290 frequency of  $\geq 1.39 \times 10^{-9}$ . A similar spontaneous resistance frequency to trimethoprim (35), to that

291 found in the current study, or spontaneous mutation to optochin (61) have been reported for other  
292 Spn strains.

293         Given the very short treatment with DoC (~10 min) to reach a MIC *in vitro*, the current study  
294 assessed whether topical administration of DoC in the upper airways will result in eradication of  
295 colonization. However, mice infected with strain EF3030 and treated with DoC in the nares showed  
296 only a slight, but non-significant, reduction of the pneumococcal density. There are a number of  
297 reasons to explain the failure to eradicate colonization via the topical route. For example, the small  
298 nasal vestibule of mice may have resulted in failure of the DoC to reach all of the nasopharyngeal  
299 tissue and/or DoC may have been absorbed before reaching pneumococcal cells. Perhaps a lower  
300 pneumococcal carriage density, longer exposure to DoC in the upper airways, or a higher volume of  
301 DoC administered into the nostrils would have resulted in a further decrease in bacterial density.  
302 Microinvasion of pneumococcus into the nasopharyngeal epithelium observed in this study, and  
303 elsewhere (62), could have been also factor for the failure of the topical route.

304         Earlier biochemical studies suggested that an autolysin(s) was responsible for the lysis of  
305 pneumococci in DoC (63). If this is true, such an autolysin should be other than the major LytA or  
306 LytC autolysins since our experiments using two different autolysis defective mutants demonstrated  
307 similar DoC susceptibility of the R6 wt strain, R6 $\Delta$ lytA $\Delta$ lytC and R6 $\Delta$ spxB $\Delta$ ctO. This mechanism,  
308 however, appears to be exquisitely specific for Spn strains since challenging other streptococci with  
309 the pneumococcus DoC MIC<sub>90</sub> the majority of those strains were not susceptible. Studies are under  
310 way in our laboratories to identify such an enzyme and/or an additional mechanism(s).

311         In summary, we demonstrated *in vitro* antimicrobial activity of DoC against several  
312 pneumococcal strains, including multidrug-resistant strains, *ex vivo* antimicrobial activity to reduce  
313 colonization of human nasopharyngeal cells and *in vivo* activity that inhibited colonization in a

314 mouse model of pneumococcal nasopharyngeal colonization. Because Spn strains colonize billions of  
315 individuals, killing at least one million every year worldwide, data within this study bears potential  
316 for future development of prophylactic interventions aimed to reduce pneumococcal colonization.

317

## 318 **Materials and Methods**

319 **Bacterial strains, culture media and reagents.** *Streptococcus* species are listed in Table 1 and Spn  
320 reference strains and isogenic mutant derivatives are listed in Table 2. All other Spn are listed in  
321 supplemental Table 1. Strains were cultured on blood agar plates containing 5% of sheep red blood  
322 cells (BAP) from frozen stocks made in medium containing skim milk, tryptone, glucose, and glycerin  
323 (STGG) (64). Animal experiments were cultured on BAP with gentamicin (25 µg/ml). Strains were  
324 inoculated in Todd Hewitt broth containing 0.5% (w/v) yeast extract (THY) or in cation-adjusted  
325 Mueller-Hinton broth (CAMHB) with 3% of lysed horse blood [(LHB), Remel]. Paraformaldehyde  
326 (PFA), gentamicin, tetracycline, trimethoprim, and sodium deoxycholate were sourced from Sigma.

327 **Preparation of inoculum for experiments.** Inoculum was prepared essentially as previously  
328 described (65, 66). Briefly, an overnight BAP culture of the strain was used to prepare a bacterial  
329 suspension in sterile phosphate buffered saline [(PBS), pH=7.4] and the fresh bacterial suspension  
330 was inoculated to a final OD<sub>600</sub> of ~0.1. This suspension contained ~5.15x10<sup>8</sup> cfu/ml. Aliquots of  
331 these suspensions were routinely diluted and plated to confirm bacterial counts (cfu/ml). To  
332 inoculate mice, Spn strain EF3030 was inoculated in THY broth and grown until it reached an OD<sub>600</sub>  
333 of ~0.2 (i.e., early log phase), then sterile glycerol was added to a final concentration of 10% and  
334 aliquots were frozen at ~-80°C. An aliquot was removed from each batch to determine the density of  
335 the preparations.

336 **Quantitative studies of the antimicrobial activity of DoC.** Studies of antimicrobial activity were  
337 performed using THY or CAMHB containing 3% of LHB. Experiments using THY were performed as  
338 follows: a bacterial suspension was inoculated in polystyrene 24-well plates (Corning) at a final  
339 density of  $\sim 5.15 \times 10^8$  cfu/ml and left untreated (control) or treated with DoC at varying dosages and  
340 incubated for 2 h at 37°C in a 5% CO<sub>2</sub> atmosphere. To remove bacteria that could have potentially  
341 attached to the substratum, the microplate was sonicated for 15 s in a Bransonic ultrasonic water  
342 bath (Branson, Dunburry CT) and then cultures were serially diluted and plated onto BAP.

343 To obtain the MIC as recommended by the CLSI we utilized the broth microdilution method  
344 (34). DoC was serially diluted in CAMHB containing 3% of LHB in 96-well microtiter plates and  
345 pneumococci, that had been adjusted to a turbidity corresponding to the 0.5 McFarland standard  
346 ( $\sim 1 \times 10^8$  cfu/ml), was inoculated and incubated for 20 h at 37°C. Untreated cultures and non-  
347 inoculated medium were included as a control. Besides reading the microplates as recommended by  
348 the CLSI, the untreated growth control, and wells with the obtained MIC were serially diluted and  
349 plated as before. As a control of the microdilution procedure, the MIC for tetracycline was assessed  
350 in parallel using reference strain Spn ATCC49619, and GA16833, which were sensitive (<1 µg/ml) and  
351 resistant (8 µg/ml), respectively.

352 **Ex-vivo model of pneumococcal colonization on human pharyngeal cells.** This *ex-vivo* adhesion  
353 model on immobilized pharyngeal cells was developed by Marks et al. (2012) (67) and thereafter  
354 utilized in pathogenesis and biofilm research by different laboratories (67-69). Human pharyngeal  
355 Detroit 562 cells (ATCC CCL-198) were cultured in DMEM (Gibco) supplemented with 10% nonheat-  
356 inactivated fetal bovine serum (FBS) (Atlanta biologicals), 1% non-essential amino acids (Sigma), 1%  
357 glutamine (Sigma), penicillin (100 U/ml), streptomycin (100 µg/ml) and the pH was buffered with  
358 HEPES [(10 mM) Gibco]. Cells were incubated at 37°C in a 5% CO<sub>2</sub> humidified atmosphere until



359 confluence ~7-10 days on an 8-well glass slide (Lab-Tek), or on CellBIND® surface polystyrene 24-  
360 well plates (Corning) and then immobilized by fixation with 2% PFA for 15 min at room  
361 temperature. After extensive washes with sterile PBS, immobilized human pharyngeal cells were  
362 supplemented with cell culture medium without antibiotics and infected with an inoculum of the  
363 tested strain prepared as mentioned earlier. Infected human pharyngeal cells were incubated for 4 h  
364 at 37°C and with 5 % CO<sub>2</sub>.

365 At the end of incubation, planktonic pneumococci were removed, attached bacteria were  
366 gently washed two times with sterile PBS and fresh cell culture medium with no antibiotics was  
367 added. Pneumococci attached to pharyngeal cells were challenged with DoC at different dosages at  
368 incubated for 2 h or treated with 0.5 mg/ml DoC and incubated for the indicated time at 37°C in a 5  
369 % CO<sub>2</sub> atmosphere. To obtain the density of pneumococci in the 24-well plate model, pneumococci  
370 and cells were washed twice with PBS and then sonicated for 15 s in a Bransonic ultrasonic water  
371 bath (Branson, Dunburry CT) followed by extensive pipetting to remove attached bacteria. The  
372 preparations were diluted and plated onto blood agar plates to obtain bacterial counts (cfu/ml).

373 To stain pneumococci adhered to cells on the 8-well glass slide, bacteria were fixed with 2%  
374 PFA as before and after three washes with PBS the preparations were blocked with 2% bovine  
375 serum albumin (BSA) for 1 h at room temperature. These preparations were then incubated for 1 h  
376 with serotype-specific polyclonal antibodies (Statens Serum Institute, Denmark) (~40 µg/ml) that  
377 had been previously labeled with Alexa-488 (anti-serotype 4-Alexa-488, to stain TIGR4) or Alexa-555  
378 (anti-serogroup 19-Alexa-555, to stain GA47281) (Molecular Probes). Stained preparations were  
379 finally washed two times with PBS. TIGR4 experiments were additionally stained with wheat germ  
380 agglutinin conjugated to Alexa-555 [(WGA), 5 µg/ml] and then mounted with ProLong Diamond  
381 Antifade mounting medium containing DAPI (Molecular Probes) whereas GA47281 preparations

382 were stained with TO-PRO-3 (1  $\mu$ M), a carbocyanine monomer nucleic acid stain (Molecular Probes),  
383 for 15 min. Confocal images were obtained using a Nikon AX R confocal microscope and analyzed  
384 with ImageJ version 1.49k (National Institutes of Health, USA).

385 **Investigating the spontaneous mutation frequency.** To determine the frequency of spontaneous  
386 mutation, BAP with 5% sheep red blood cells were prepared to contain either trimethoprim (1  
387  $\mu$ g/ml) or DoC (0.5 mg/ml). Fresh suspensions of Spn strain EF3030, or TIGR4, made in PBS were  
388 prepared at a final density of  $\sim 10^8$ ,  $\sim 10^9$ ,  $\sim 10^{10}$ ,  $\sim 10^{11}$ , and  $\sim 10^{12}$  cfu/ml and inoculated on plain BAP  
389 or BAP containing trimethoprim or DoC . Bacterial suspensions were diluted and plated onto plain  
390 BAP to confirm the density of pneumococci. Inoculated plates were incubated at 37°C under a 5 %  
391 CO<sub>2</sub> atmosphere for  $\sim 20$  h. The spontaneous mutation frequency was then calculated by dividing the  
392 spontaneous resistant pneumococci, i.e., grown on BAP with trimethoprim or DoC, by the bacterial  
393 population.

394 **Mouse model of pneumococcal nasopharyngeal carriage.** Three groups (N=8 each) of inbred 6-  
395 7week old C57BL/6 mice (Charles River Laboratories) were utilized to assess *in vivo* antimicrobial  
396 activity of DoC. Two groups of mice drank regular water throughout. The drinking water of the third  
397 group of mice was supplemented with DoC to a final concentration of 0.2  $\mu$ g/ml (i.e., 0.02%) starting  
398 at day 0 of the experiment, and DoC-containing water was provided *ad libitum* for remainder of the  
399 experiment (10 days). Six days after DoC was added to the drinking water of mice in group three,  
400 mice in all three groups were anesthetized with 2.5% isoflurane (vol/vol) over oxygen (2 liter/min)  
401 administered in a RC2 calibrated vaporizer (VetEquip Incorporated) and then infected with  $\sim 1 \times 10^5$   
402 cfu of Spn EF3030. Twenty-four hours post-nasal-inoculation of EF3030, mice in groups 1 and 2 were  
403 treated by nasal instillation with PBS or DoC (10  $\mu$ g each nostril), respectively, two times a day for  
404 four days. Mice were then sacrificed, and the nasopharynx, trachea, lungs and blood were

405 aseptically collected. Tissue homogenates were diluted in PBS and plated onto BAP with gentamicin.  
406 Aliquots of these homogenates were supplemented to a final concentration of 10% glycerol and  
407 kept at -80°C. The Institutional Animal Care and Use Committee (IACUC) at the University of  
408 Mississippi Medical Center approved the protocol used in this study (1584); they oversees the  
409 welfare, well-being, and proper care of all mice utilized in this study. All mouse experiments  
410 followed the guidelines summarized by the National Science Foundation Animal Welfare Act (AWA).  
411 **DNA extraction from nasopharyngeal homogenates and quantitative (q)PCR reactions.** DNA was  
412 extracted from mouse nasopharyngeal homogenates using the Qiagen QIAmp Mini Kit. Briefly, an  
413 aliquot (50 µl) of nasopharyngeal specimen was added to 100 µL of TE buffer containing 0.04 g/mL  
414 lysozyme and 75 U/mL of mutanolysin. Samples were then incubated for 1 h in a 37°C water bath.  
415 Following incubation, DNA was extracted from the samples following the recommended protocol  
416 from the manufacturer, eluted in 100 µL of buffer AE and kept at -80°C until used. Following  
417 extraction, *lytA*-based qPCR reactions were performed with primers and probe sequences published  
418 by the CDC (70), the real-time PCR reagent QuantaBio PerfeCTa FastMix®, and 2.5 µL of DNA  
419 template. Reactions were run in duplicate using a CFX96 Real-Time PCR Detection System (Bio-Rad)  
420 at the following conditions: 1 cycle at 50°C for 2 min, 1 cycle at 95°C for 2 min and 40 cycles of 95°C  
421 for 15 s, and 60°C for 1 min. Standard curves were generated under the same conditions as detailed  
422 in our previous studies (71, 72). Considering the genome size of reference strain TIGR4, 2.16 Mb  
423 (73), the approximate genome equivalent for each DNA standard was:  $4.29 \times 10^5$ ,  $4.29 \times 10^4$ ,  $4.29 \times 10^3$ ,  
424  $4.29 \times 10^2$ ,  $4.29 \times 10^1$ ,  $2.14 \times 10^1$ , and 2.14 genome equivalents. Reaction efficiency of standards was  
425 within the acceptable range of 90-110%.

426 **Quantification of extracellular (e)DNA.** Spn strains were inoculated into 24-well plates as detailed  
427 earlier and incubated for 4 h. The culture supernatants were then harvested by centrifugation for 15

428 min at 14,000 x *g* in a refrigerated centrifuge (Eppendorf, Hauppauge, NY), and filter sterilized using  
429 a syringe-filter (0.4  $\mu\text{m}$ ). DNA was purified from 200  $\mu\text{l}$  aliquots of supernatant, as mentioned above,  
430 and used as template in *lytA*-based qPCR reactions. For eDNA quantification purposes, standards  
431 containing  $1 \times 10^3$ ,  $1 \times 10^2$ ,  $1 \times 10^1$ ,  $1 \times 10^0$ ,  $1 \times 10^{-1}$ ,  $5 \times 10^{-2}$ ,  $1 \times 10^{-3}$  pg of chromosomal DNA purified from  
432 strain TIGR4 were run in parallel to generate a standard curve. The standard curve, and regression  
433 equation obtained, was then used to calculate final pg/ml using the CFX software (Bio-Rad, Hercules,  
434 CA).

435 **Statistical analysis.** Statistical analysis was performed by the non-parametric two-tailed Student *t*  
436 test, or the Mann-Whitney *U* test (comparing two groups) using the software GraphPad Prism  
437 version 9.0.0 (121).

438

#### 439 **Figure legends.**

440 **Figure 1. Deoxycholic acid kills *S. pneumoniae* strains within two hours of incubation.** *S.*  
441 *pneumoniae* strain (A) GA47281, (B) GA44288, (C) GA17227, (D) TIGR4, or (E) D39 was inoculated at  
442 a density of  $\sim 5.15 \times 10^8$  cfu/ml in THY broth and left untreated (control) or treated with 0.5 mg/ml or  
443 0.25 mg/ml of deoxycholic acid (DoC). Bacteria were incubated for 2 h at 37°C in a 5% CO<sub>2</sub>  
444 atmosphere after which the cultures were serially diluted and plated onto blood agar plates to  
445 obtain the density (cfu/ml). Error bars represent the standard errors of the means calculated using  
446 data from at least three independent experiments. The limit of detection (LOD) was <10 cfu/ml.

447 **Figure 2. Eradication of pneumococcal colonization with DoC using an *ex vivo* model of human**  
448 **pharyngeal colonization.** Polarized human pharyngeal Detroit 562 cells were immobilized with 2%  
449 paraformaldehyde and then infected with *S. pneumoniae* strain GA47281 ( $\sim 5.15 \times 10^8$  cfu/ml).  
450 Infected cells were incubated for four hours and planktonic cells were removed. These *S.*

451 *pneumoniae*-colonized human pharyngeal cells were left untreated (control) or (A) treated with  
452 different dosages of deoxycholic acid (DoC) and incubated for an additional 2 h period, or (B) treated  
453 with DoC (0.5 mg/ml) and incubated for the indicated time. At the end of the incubation the cultures  
454 were serially diluted and plated onto blood agar plates to obtain the density (cfu/ml). In (A and B)  
455 error bars represent the standard errors of the means calculated using data from at least three  
456 independent experiments. \* $p < 0.05$  compared to the untreated control. LOD=limit of detection. (C  
457 and D) *S. pneumoniae*-colonized human pharyngeal cells (infected as above) were left untreated or  
458 treated with DoC (0.5 mg/ml) and incubated for 2 h. Preparations were fixed and Spn was stained  
459 with (C) an anti-S19-Alexa-555 labeled antibody (red) and the DNA was stained with TOPRO3 (green)  
460 or with (D) an anti-S4-Alexa-488 labeled antibody (green), cell membranes were labeled with WGA  
461 (Red) and DNA with DAPI (blue). Preparations were analyzed by a confocal microscope. Panels show  
462 z-projections of z-stacks obtained from xy optical sections. Lower panels in (C) show a 3-D digital  
463 reconstruction. The merge of the channels is shown in each panel. Arrows point out extracellular *S.*  
464 *pneumoniae* bacteria.

465 **Figure 3. Spontaneous resistance mutation frequency of *S. pneumoniae* for trimethoprim and**  
466 **deoxycholic acid.** Bacterial suspensions prepared with fresh cultures of *S. pneumoniae* strain  
467 EF3030, or TIGR4, were adjusted to a density of  $\sim 10^8$ ,  $\sim 10^9$ ,  $\sim 10^{10}$ ,  $\sim 10^{11}$ , and  $\sim 10^{12}$  cfu/ml and  
468 inoculated onto blood agar plates (BAP) containing trimethoprim (Tmp, 1  $\mu$ g/ml) or deoxycholic acid  
469 (DoC, 0.5 mg/ml). Each inoculum was further diluted and plated onto plain BAP. All cultures were  
470 incubated for 20 h after which bacteria were counted. The spontaneous mutation frequency (smF)  
471 was calculated by dividing the number of spontaneous resistant pneumococci, i.e., grown on BAP  
472 with trimethoprim or DoC, by the bacterial population. Error bars represent the standard errors of

473 the means calculated using data from at least three independent experiments. The median smF is  
474 shown on each bar.

475 **Figure 4. Deoxycholic acid kills pneumococci with a deficient autolytic mechanism.** (A) *S.*  
476 *pneumoniae* strain R6 wt, or isogenic double mutants  $\Delta\text{lytA}\Delta\text{lytC}$  or  $\Delta\text{spxB}\Delta\text{lctO}$  were inoculated in  
477 six-well plates containing THY and bacteria were incubated for 4 h. The supernatants were obtained,  
478 filter sterilized and eDNA was purified. This eDNA was used as a template in species-specific  
479 quantitative (q)PCR reactions along with DNA standards for quantification purposes. \*statistical  
480 significance,  $p < 0.037$ , compared to R6 wt. (B) R6 wt or its isogenic  $\Delta\text{lytA}\Delta\text{lytC}$  mutant was  
481 inoculated at a density of  $\sim 5.15 \times 10^8$  cfu/ml in THY broth and left untreated (control) or treated with  
482 0.5 mg/ml of DoC. Bacteria were incubated for 2 h at 37°C in a 5% CO<sub>2</sub> atmosphere after which the  
483 cultures were serially diluted and plated onto blood agar plates to obtain the density (cfu/ml).  
484 # $p = 0.33$  compared to R6 wt strain treated with DoC. In panels A and B error bars represent the  
485 standard errors of the means calculated using data from at least three independent experiments.

486 **Figure 5. Deoxycholic acid (0.5 mg/ml) does not affect the viability of other streptococcal species.**  
487 (A) *S. pneumoniae* strain EF3030, (B) *S. oralis*, (C) *S. mutans*, (D) *S. gordonii*, or (E) *S. anginosus* was  
488 inoculated at a density of  $\sim 5.15 \times 10^8$  cfu/ml in THY broth and left untreated (control) or treated with  
489 0.5 mg/ml deoxycholic acid (DoC). Bacteria were incubated for 2 h at 37°C in a 5% CO<sub>2</sub> atmosphere  
490 after which the cultures were serially diluted and plated onto blood agar plates to obtain the density  
491 (cfu/ml). Error bars represent the standard errors of the means calculated using data from at least  
492 three independent experiments. \*statistical significance,  $p < 0.04$ , compared to the untreated EF3030  
493 control.

494 **Figure 6. Revisiting the mouse model of pneumococcal nasopharyngeal carriage.** C57BL/6 mice  
495 (N=5) were intranasally inoculated with *S. pneumoniae* EF3030 ( $\sim 1 \times 10^5$  cfu). After 48 h mice were

496 euthanized and the nasal bone was removed to expose the (A) nasopharynx, arrow. The  
497 nasopharynx, trachea and lungs were removed. (B) The nasopharynges were sectioned ( $\sim 5 \mu\text{m}$ ) and  
498 stained with hematoxylin and eosin. Arrowhead=microvilli, dotted line=connective tissue.  
499 Nasopharyngeal (NP) tissue, trachea, and lungs were homogenized and (C) NP homogenate was  
500 stained with DAPI and with an anti-S19-Alexa-555 antibody, or (D) homogenates were diluted and  
501 plated onto BAP with gentamicin ( $25 \mu\text{g}/\text{ml}$ ) to obtain the bacterial density (cfu/ml). (E) NP tissue  
502 stained with TOTO-1 and with an anti-S19-Alexa-555 antibody; arrows=pneumococci (red). The  
503 micrographs in C and D are z-projections of z-stacks obtained from xy optical sections collected with  
504 a confocal microscope.

505 **Figure 7. Prophylactic treatment with deoxycholic acid inhibits pneumococcal colonization in a**  
506 **mouse model of colonization.** (A) Experimental design. Three groups of mice (N=8) were utilized;  
507 groups 1 and 2 drank regular water throughout whereas group 3 was prophylactically (pro) treated  
508 by adding DoC ( $0.2 \mu\text{g}/\text{ml}$ ) to their drinking water at day 0. At day 6, all three groups were infected  
509 with *S. pneumoniae* EF3030. Twenty-four hours post inoculation, mice in groups 1 and 2 were  
510 treated via intranasal (nasal) inoculation with PBS (Ctrl) or DoC ( $10 \mu\text{g}$  each nostril) two times a day  
511 for four days. All mice were sacrificed at day 10 and the nasopharynx, trachea, lungs and blood were  
512 collected. (B) Mice in all three groups were weighed at days 0 and 10. (C) Nasopharyngeal  
513 specimens were homogenized, diluted, and plated onto BAP with gentamicin ( $25 \mu\text{g}/\text{ml}$ ) to obtain  
514 bacterial density (cfu/ml). (D) DNA was extracted from nasopharyngeal homogenates and used in  
515 species-specific *lytA*-based qPCR reactions. In panels B and C  $=*p>0.249$  (NS), or  $**p<0.003$ ,  
516 compared with control mice.

517 **Supplemental figure 1. Deoxycholic acid kill *S. pneumoniae* strain TIGR4 inoculated into CAMHB**  
518 **with 3% lysed horse blood.** *S. pneumoniae* strain TIGR4 was inoculated at a density of  $\sim 5.15 \times 10^8$

519 cfu/ml into CAMHB-LHB and left untreated (control) or treated with 0.5, 1, or 2 mg/ml of  
520 deoxycholic acid (DoC). Bacteria were incubated ~20 h at 37°C in a 5% CO<sub>2</sub> atmosphere after which  
521 the cultures were serially diluted and plated onto blood agar plates to obtain the density (cfu/ml).  
522 Error bars represent the standard errors of the means calculated using data from at least three  
523 independent experiments. The median density is shown inside the control bar or above DoC (0.5).  
524 Limit of detection (LOD) was <10 cfu/ml.

525

## 526 **Acknowledgements**

527 This study was in part supported by grants from the National Institutes of Health (NIH;  
528 1R21AI144571-01, and 1R21AI151571-01A1 to JEV). BA was supported by a Fulbright scholarship  
529 awarded by the US Department of State. The content is solely the responsibility of the authors and  
530 does not necessarily represent the official view of the NIH or the US Department of State. We thank  
531 Dr. Yih-Ling Tzeng and Dr. David Stephens from Emory University School of Medicine and Dr. Lesley  
532 McGee from the Centers for Disease Control and Prevention (CDC) for providing *S. pneumoniae*  
533 strains. We also thanks Dr. Miriam Moscoso from “Centro de Investigaciones Biologicas” in Madrid,  
534 Spain for providing the autolysin knockout mutant. Special thanks to Dr. Gene L. Bidwell (Cell and  
535 Molecular Biology) and Joshua R. Jefferson (Pathology) at UMMC for providing assistance with  
536 confocal microscopy and histology studies, respectively. Landon Murin from the Murrah-UMMC  
537 base pair program for his assistance in some laboratory procedures.

538



## 539 References

- 540 1. Shak JR, Vidal JE, Klugman KP. 2013. Influence of bacterial interactions on pneumococcal  
541 colonization of the nasopharynx. *Trends Microbiol* 21:129-35.
- 542 2. Simell B, Auranen K, Kayhty H, Goldblatt D, Dagan R, O'Brien KL, Pneumococcal Carriage G.  
543 2012. The fundamental link between pneumococcal carriage and disease. *Expert Rev*  
544 *Vaccines* 11:841-55.
- 545 3. Arguedas A, Trzcinski K, O'Brien KL, Ferreira DM, Wyllie AL, Weinberger D, Danon L, Pelton SI,  
546 Azzari C, Hammitt LL, Sa-Leao R, Brandileone MC, Saha S, Suaya J, Isturiz R, Jodar L, Gessner  
547 BD. 2020. Upper respiratory tract colonization with *Streptococcus pneumoniae* in adults.  
548 *Expert Rev Vaccines* 19:353-366.
- 549 4. Dunne EM, Smith-Vaughan HC, Robins-Browne RM, Mulholland EK, Satzke C. 2013.  
550 Nasopharyngeal microbial interactions in the era of pneumococcal conjugate vaccination.  
551 *Vaccine* 31:2333-42.
- 552 5. Krone CL, Wyllie AL, van Beek J, Rots NY, Oja AE, Chu ML, Bruin JP, Bogaert D, Sanders EA,  
553 Trzcinski K. 2015. Carriage of *Streptococcus pneumoniae* in aged adults with influenza-like-  
554 illness. *PLoS One* 10:e0119875.
- 555 6. Kwambana BA, Barer MR, Bottomley C, Adegbola RA, Antonio M. 2011. Early acquisition and  
556 high nasopharyngeal co-colonisation by *Streptococcus pneumoniae* and three respiratory  
557 pathogens amongst Gambian new-borns and infants. *BMC Infect Dis* 11:175.
- 558 7. Nelson KN, Grijalva CG, Chochua S, Hawkins PA, Gil AI, Lanata CF, Griffin MR, Edwards KM,  
559 Klugman KP, Vidal JE. 2018. Dynamics of Colonization of *Streptococcus pneumoniae* Strains  
560 in Healthy Peruvian Children. *Open Forum Infect Dis* 5:ofy039.
- 561 8. Sutcliffe CG, Grant LR, Cloessner E, Klugman KP, Vidal JE, Reid R, Colelay J, Weatherholtz RC,  
562 Chochua S, Jacobs MR, Santosham M, O'Brien KL, Hammitt LL. 2019. Association of  
563 Laboratory Methods, Colonization Density, and Age With Detection of *Streptococcus*  
564 *pneumoniae* in the Nasopharynx. *Am J Epidemiol* 188:2110-2119.
- 565 9. Wyllie AL, Rumke LW, Arp K, Bosch A, Bruin JP, Rots NY, Wijmenga-Monsuur AJ, Sanders  
566 EAM, Trzcinski K. 2016. Molecular surveillance on *Streptococcus pneumoniae* carriage in  
567 non-elderly adults; little evidence for pneumococcal circulation independent from the  
568 reservoir in children. *Sci Rep* 6:34888.
- 569 10. van Deursen AM, van den Bergh MR, Sanders EA, Carriage Pilot Study G. 2016. Carriage of  
570 *Streptococcus pneumoniae* in asymptomatic, community-dwelling elderly in the  
571 Netherlands. *Vaccine* 34:4-6.
- 572 11. Lai CC, Wang CY, Hsueh PR. 2020. Co-infections among patients with COVID-19: The need for  
573 combination therapy with non-anti-SARS-CoV-2 agents? *J Microbiol Immunol Infect*  
574 doi:10.1016/j.jmii.2020.05.013.
- 575 12. Dananche C, Paranhos-Baccala G, Messaoudi M, Sylla M, Awasthi S, Bavdekar A, Sanghavi S,  
576 Diallo S, Pape JW, Rouzier V, Chou M, Eap T, Rakoto-Andrianarivelo M, Maeder M, Wang J,  
577 Ren L, Dash-Yandag B, Nymadawa P, Guillen R, Russomando G, Endtz H, Komurian-Pradel F,  
578 Vanhems P, Sanchez Picot V. 2020. Serotypes of *Streptococcus pneumoniae* in Children Aged  
579 <5 Years Hospitalized With or Without Pneumonia in Developing and Emerging Countries: A  
580 Descriptive, Multicenter Study. *Clin Infect Dis* 70:875-883.
- 581 13. Weiser JN, Ferreira DM, Paton JC. 2018. *Streptococcus pneumoniae*: transmission,  
582 colonization and invasion. *Nat Rev Microbiol* 16:355-367.

- 583 14. Davis SM, Deloria-Knoll M, Kassa HT, O'Brien KL. 2013. Impact of pneumococcal conjugate  
584 vaccines on nasopharyngeal carriage and invasive disease among unvaccinated people:  
585 review of evidence on indirect effects. *Vaccine* 32:133-45.
- 586 15. Klugman KP. 2001. Efficacy of pneumococcal conjugate vaccines and their effect on carriage  
587 and antimicrobial resistance. *Lancet Infect Dis* 1:85-91.
- 588 16. O'Brien KL, Dagan R. 2003. The potential indirect effect of conjugate pneumococcal vaccines.  
589 *Vaccine* 21:1815-25.
- 590 17. Simonsen L, Taylor RJ, Schuck-Paim C, Lustig R, Haber M, Klugman KP. 2014. Effect of 13-  
591 valent pneumococcal conjugate vaccine on admissions to hospital 2 years after its  
592 introduction in the USA: a time series analysis. *Lancet Respir Med* 2:387-94.
- 593 18. Feikin DR, Kagucia EW, Loo JD, Link-Gelles R, Puhan MA, Cherian T, Levine OS, Whitney CG,  
594 O'Brien KL, Moore MR. 2013. Serotype-specific changes in invasive pneumococcal disease  
595 after pneumococcal conjugate vaccine introduction: a pooled analysis of multiple  
596 surveillance sites. *PLoS Med* 10:e1001517.
- 597 19. Singleton RJ, Hennessy TW, Bulkow LR, Hammitt LL, Zulz T, Hurlburt DA, Butler JC, Rudolph K,  
598 Parkinson A. 2007. Invasive pneumococcal disease caused by nonvaccine serotypes among  
599 alaska native children with high levels of 7-valent pneumococcal conjugate vaccine coverage.  
600 *Jama* 297:1784-92.
- 601 20. Weinberger DM, Malley R, Lipsitch M. 2011. Serotype replacement in disease after  
602 pneumococcal vaccination. *Lancet* 378:1962-73.
- 603 21. Winkler ES, Shrihari S, Hykes BL, Jr., Handley SA, Andhey PS, Huang YS, Swain A, Droit L,  
604 Chebrolu KK, Mack M, Vanlandingham DL, Thackray LB, Cella M, Colonna M, Artyomov MN,  
605 Stappenbeck TS, Diamond MS. 2020. The Intestinal Microbiome Restricts Alphavirus  
606 Infection and Dissemination through a Bile Acid-Type I IFN Signaling Axis. *Cell* 182:901-918  
607 e18.
- 608 22. Sun X, Winglee K, Gharaibeh RZ, Gauthier J, He Z, Tripathi P, Avram D, Bruner S, Fodor A,  
609 Jobin C. 2018. Microbiota-Derived Metabolic Factors Reduce Campylobacteriosis in Mice.  
610 *Gastroenterology* 154:1751-1763 e2.
- 611 23. Wang H, Latorre JD, Bansal M, Abraha M, Al-Rubaye B, Tellez-Isaias G, Hargis B, Sun X. 2019.  
612 Microbial metabolite deoxycholic acid controls *Clostridium perfringens*-induced chicken  
613 necrotic enteritis through attenuating inflammatory cyclooxygenase signaling. *Sci Rep*  
614 9:14541.
- 615 24. Boyer JL. 2013. Bile formation and secretion. *Compr Physiol* 3:1035-78.
- 616 25. Wahlstrom A, Sayin SI, Marschall HU, Backhed F. 2016. Intestinal Crosstalk between Bile  
617 Acids and Microbiota and Its Impact on Host Metabolism. *Cell Metab* 24:41-50.
- 618 26. Foley MH, O'Flaherty S, Barrangou R, Theriot CM. 2019. Bile salt hydrolases: Gatekeepers of  
619 bile acid metabolism and host-microbiome crosstalk in the gastrointestinal tract. *PLoS*  
620 *Pathog* 15:e1007581.
- 621 27. Woollett LA, Buckley DD, Yao L, Jones PJ, Granholm NA, Tolley EA, Tso P, Heubi JE. 2004.  
622 Cholic acid supplementation enhances cholesterol absorption in humans. *Gastroenterology*  
623 126:724-31.
- 624 28. Kamalpour S, Leblanc K, Jr. 2016. Injection Adipolysis: Mechanisms, Agents, and Future  
625 Directions. *J Clin Aesthet Dermatol* 9:44-50.
- 626 29. Amore R, Amuso D, Leonardi V, Leva F, Sibaud AC, Guida A, Costa E, Terranova F, Amodeo V,  
627 Gkritzalas K. 2018. Evaluation of Safe and Effectiveness of an Injectable Solution Acid

- 628 Deoxycholic Based for Reduction of Localized Adiposities. *Plast Reconstr Surg Glob Open*  
629 6:e1794.
- 630 30. Winston JA, Rivera AJ, Cai J, Thanissery R, Montgomery SA, Patterson AD, Theriot CM. 2020.  
631 Ursodeoxycholic Acid (UDCA) Mitigates the Host Inflammatory Response during  
632 *Clostridioides difficile* Infection by Altering Gut Bile Acids. *Infect Immun* 88.
- 633 31. McDonald JAK, Mullish BH, Pechlivanis A, Liu Z, Brignardello J, Kao D, Holmes E, Li JV, Clarke  
634 TB, Thursz MR, Marchesi JR. 2018. Inhibiting Growth of *Clostridioides difficile* by Restoring  
635 Valerate, Produced by the Intestinal Microbiota. *Gastroenterology* 155:1495-1507 e15.
- 636 32. Olivera C, Le VVH, Davenport C, Rakonjac J. 2021. In vitro synergy of 5-nitrofurans,  
637 vancomycin and sodium deoxycholate against Gram-negative pathogens. *J Med Microbiol*  
638 70.
- 639 33. Kang JD, Myers CJ, Harris SC, Kakiyama G, Lee IK, Yun BS, Matsuzaki K, Furukawa M, Min HK,  
640 Bajaj JS, Zhou H, Hylemon PB. 2019. Bile Acid 7 $\alpha$ -Dehydroxylating Gut Bacteria Secrete  
641 Antibiotics that Inhibit *Clostridium difficile*: Role of Secondary Bile Acids. *Cell Chem Biol*  
642 26:27-34 e4.
- 643 34. Institute. CaLS. 2020. Performance Standards for Antimicrobial Susceptibility Testing.  
644 Thirtieth Informational Supplement. M100-S30. Wayne, PA.
- 645 35. Henderson-Begg SK, Livermore DM, Hall LM. 2006. Effect of subinhibitory concentrations of  
646 antibiotics on mutation frequency in *Streptococcus pneumoniae*. *J Antimicrob Chemother*  
647 57:849-54.
- 648 36. Eldholm V, Johnsborg O, Haugen K, Ohnstad HS, Havarstein LS. 2009. Fratricide in  
649 *Streptococcus pneumoniae*: contributions and role of the cell wall hydrolases CbpD, LytA and  
650 LytC. *Microbiology* 155:2223-2234.
- 651 37. Havarstein LS, Martin B, Johnsborg O, Granadel C, Claverys JP. 2006. New insights into the  
652 pneumococcal fratricide: relationship to clumping and identification of a novel immunity  
653 factor. *Mol Microbiol* 59:1297-307.
- 654 38. Wu X, Gordon O, Jiang W, Antezana BS, Angulo-Zamudio UA, Del Rio C, Moller A, Brissac T,  
655 Tierney ARP, Warncke K, Orihuela CJ, Read TD, Vidal JE. 2019. Interaction between  
656 *Streptococcus pneumoniae* and *Staphylococcus aureus* Generates (.)OH Radicals That Rapidly  
657 Kill *Staphylococcus aureus* Strains. *J Bacteriol* 201.
- 658 39. Bryant JC, Dabbs RC, Oswalt KL, Brown LR, Rosch JW, Seo KS, Donaldson JR, McDaniel LS,  
659 Thornton JA. 2016. Pyruvate oxidase of *Streptococcus pneumoniae* contributes to  
660 pneumolysin release. *BMC Microbiol* 16:271.
- 661 40. Echlin H, Frank M, Rock C, Rosch JW. 2020. Role of the pyruvate metabolic network on  
662 carbohydrate metabolism and virulence in *Streptococcus pneumoniae*. *Mol Microbiol*  
663 doi:10.1111/mmi.14557.
- 664 41. Junges R, Maienschein-Cline M, Morrison DA, Petersen FC. 2019. Complete Genome  
665 Sequence of *Streptococcus pneumoniae* Serotype 19F Strain EF3030. *Microbiol Resour*  
666 Announc 8.
- 667 42. Scott EJ, 2nd, Luke-Marshall NR, Campagnari AA, Dyer DW. 2019. Draft Genome Sequence of  
668 Pediatric Otitis Media Isolate *Streptococcus pneumoniae* Strain EF3030, Which Forms In  
669 Vitro Biofilms That Closely Mimic In Vivo Biofilms. *Microbiol Resour Announc* 8.
- 670 43. Puchta A, Verschoor CP, Thurn T, Bowdish DM. 2014. Characterization of inflammatory  
671 responses during intranasal colonization with *Streptococcus pneumoniae*. *J Vis Exp*  
672 doi:10.3791/50490:e50490.

- 673 44. Keller LE, Luo X, Thornton JA, Seo KS, Moon BY, Robinson DA, McDaniel LS. 2015.  
674 Immunization with Pneumococcal Surface Protein K of Nonencapsulated *Streptococcus*  
675 *pneumoniae* Provides Protection in a Mouse Model of Colonization. *Clin Vaccine Immunol*  
676 22:1146-53.
- 677 45. Metlay JP, Waterer GW, Long AC, Anzueto A, Brozek J, Crothers K, Cooley LA, Dean NC, Fine  
678 MJ, Flanders SA, Griffin MR, Metersky ML, Musher DM, Restrepo MI, Whitney CG. 2019.  
679 Diagnosis and Treatment of Adults with Community-acquired Pneumonia. An Official Clinical  
680 Practice Guideline of the American Thoracic Society and Infectious Diseases Society of  
681 America. *Am J Respir Crit Care Med* 200:e45-e67.
- 682 46. Lim WS, Baudouin SV, George RC, Hill AT, Jamieson C, Le Jeune I, Macfarlane JT, Read RC,  
683 Roberts HJ, Levy ML, Wani M, Woodhead MA, Pneumonia Guidelines Committee of the  
684 BTSSoCC. 2009. BTS guidelines for the management of community acquired pneumonia in  
685 adults: update 2009. *Thorax* 64 Suppl 3:iii1-55.
- 686 47. Northfield TC, McColl I. 1973. Postprandial concentrations of free and conjugated bile acids  
687 down the length of the normal human small intestine. *Gut* 14:513-8.
- 688 48. Vertzoni M, Archontaki H, Reppas C. 2008. Determination of intraluminal individual bile  
689 acids by HPLC with charged aerosol detection. *J Lipid Res* 49:2690-5.
- 690 49. Lawley TD, Clare S, Walker AW, Goulding D, Stabler RA, Croucher N, Mastroeni P, Scott P,  
691 Raisen C, Mottram L, Fairweather NF, Wren BW, Parkhill J, Dougan G. 2009. Antibiotic  
692 treatment of *clostridium difficile* carrier mice triggers a supershedder state, spore-mediated  
693 transmission, and severe disease in immunocompromised hosts. *Infect Immun* 77:3661-9.
- 694 50. Sipka S, Bruckner G. 2014. The immunomodulatory role of bile acids. *Int Arch Allergy*  
695 *Immunol* 165:1-8.
- 696 51. Keating N, Keely SJ. 2009. Bile acids in regulation of intestinal physiology. *Curr Gastroenterol*  
697 *Rep* 11:375-82.
- 698 52. Lajczak NK, Saint-Criq V, O'Dwyer AM, Perino A, Adorini L, Schoonjans K, Keely SJ. 2017. Bile  
699 acids deoxycholic acid and ursodeoxycholic acid differentially regulate human beta-defensin-  
700 1 and -2 secretion by colonic epithelial cells. *FASEB J* 31:3848-3857.
- 701 53. Choucair I, Nemet I, Li L, Cole MA, Skye SM, Kirsop JD, Fischbach MA, Gogonea V, Brown JM,  
702 Tang WHW, Hazen SL. 2020. Quantification of bile acids: a mass spectrometry platform for  
703 studying gut microbe connection to metabolic diseases. *J Lipid Res* 61:159-177.
- 704 54. Danese E, Negrini D, Pucci M, De Nitto S, Ambrogi D, Donzelli S, Lievens PM, Salvagno GL,  
705 Lippi G. 2020. Bile Acids Quantification by Liquid Chromatography-Tandem Mass  
706 Spectrometry: Method Validation, Reference Range, and Interference Study. *Diagnostics*  
707 (Basel) 10.
- 708 55. Mroz MS, Lajczak NK, Goggins BJ, Keely S, Keely SJ. 2018. The bile acids, deoxycholic acid and  
709 ursodeoxycholic acid, regulate colonic epithelial wound healing. *Am J Physiol Gastrointest*  
710 *Liver Physiol* 314:G378-G387.
- 711 56. Wadsworth A. 1903. The Agglutination of the *Pneumococcus* with certain Normal and  
712 Immune Sera. *J Med Res* 10:228-42.
- 713 57. Sadowy E, Hryniewicz W. 2020. Identification of *Streptococcus pneumoniae* and other Mitis  
714 streptococci: importance of molecular methods. *Eur J Clin Microbiol Infect Dis* 39:2247-2256.
- 715 58. Satzke C, Turner P, Virolainen-Julkunen A, Adrian PV, Antonio M, Hare KM, Henao-Restrepo  
716 AM, Leach AJ, Klugman KP, Porter BD, Sa-Leao R, Scott JA, Nohynek H, O'Brien KL, Group  
717 WHOPCW. 2013. Standard method for detecting upper respiratory carriage of *Streptococcus*

- 718 pneumoniae: updated recommendations from the World Health Organization Pneumococcal  
719 Carriage Working Group. *Vaccine* 32:165-79.
- 720 59. Slotved HC, Facklam RR, Fuursted K. 2017. Assessment of a novel bile solubility test and  
721 MALDI-TOF for the differentiation of *Streptococcus pneumoniae* from other mitis group  
722 streptococci. *Sci Rep* 7:7167.
- 723 60. Mundy LS, Janoff EN, Schwebke KE, Shanholtzer CJ, Willard KE. 1998. Ambiguity in the  
724 identification of *Streptococcus pneumoniae*. Optochin, bile solubility, quellung, and the  
725 AccuProbe DNA probe tests. *Am J Clin Pathol* 109:55-61.
- 726 61. Cortes PR, Orio AG, Regueira M, Pinas GE, Echenique J. 2008. Characterization of in vitro-  
727 generated and clinical optochin-resistant strains of *Streptococcus pneumoniae* isolated from  
728 Argentina. *J Clin Microbiol* 46:1930-4.
- 729 62. Weight CM, Venturini C, Pojar S, Jochems SP, Reine J, Nikolaou E, Solorzano C, Noursadeghi  
730 M, Brown JS, Ferreira DM, Heyderman RS. 2019. Microinvasion by *Streptococcus*  
731 *pneumoniae* induces epithelial innate immunity during colonisation at the human mucosal  
732 surface. *Nat Commun* 10:3060.
- 733 63. Mosser JL, Tomasz A. 1970. Choline-containing teichoic acid as a structural component of  
734 pneumococcal cell wall and its role in sensitivity to lysis by an autolytic enzyme. *J Biol Chem*  
735 245:287-98.
- 736 64. O'Brien KL, Bronsdon MA, Dagan R, Yagupsky P, Janco J, Elliott J, Whitney CG, Yang YH,  
737 Robinson LG, Schwartz B, Carlone GM. 2001. Evaluation of a medium (STGG) for transport  
738 and optimal recovery of *Streptococcus pneumoniae* from nasopharyngeal secretions  
739 collected during field studies. *J Clin Microbiol* 39:1021-4.
- 740 65. Vidal JE, Ludewick HP, Kunkel RM, Zahner D, Klugman KP. 2011. The LuxS-dependent  
741 quorum-sensing system regulates early biofilm formation by *Streptococcus pneumoniae*  
742 strain D39. *Infect Immun* 79:4050-60.
- 743 66. Wu X, Jacobs NT, Bozio C, Palm P, Lattar SM, Hanke CR, Watson DM, Sakai F, Levin BR,  
744 Klugman KP, Vidal JE. 2017. Competitive Dominance within Biofilm Consortia Regulates the  
745 Relative Distribution of Pneumococcal Nasopharyngeal Density. *Appl Environ Microbiol* 83.
- 746 67. Marks LR, Parameswaran GI, Hakansson AP. 2012. Pneumococcal interactions with epithelial  
747 cells are crucial for optimal biofilm formation and colonization in vitro and in vivo. *Infect*  
748 *Immun* 80:2744-60.
- 749 68. Vidal JE, Howery KE, Ludewick HP, Nava P, Klugman KP. 2013. Quorum-sensing systems  
750 LuxS/autoinducer 2 and Com regulate *Streptococcus pneumoniae* biofilms in a bioreactor  
751 with living cultures of human respiratory cells. *Infect Immun* 81:1341-53.
- 752 69. Wholey WY, Kochan TJ, Storck DN, Dawid S. 2016. Coordinated Bacteriocin Expression and  
753 Competence in *Streptococcus pneumoniae* Contributes to Genetic Adaptation through  
754 Neighbor Predation. *PLoS Pathog* 12:e1005413.
- 755 70. Carvalho Mda G, Tondella ML, McCaustland K, Weidlich L, McGee L, Mayer LW, Steigerwalt  
756 A, Whaley M, Facklam RR, Fields B, Carlone G, Ades EW, Dagan R, Sampson JS. 2007.  
757 Evaluation and improvement of real-time PCR assays targeting *lytA*, *ply*, and *psaA* genes for  
758 detection of pneumococcal DNA. *J Clin Microbiol* 45:2460-6.
- 759 71. Sakai F, Sonaty G, Watson D, Klugman KP, Vidal JE. 2017. Development and characterization  
760 of a synthetic DNA, NUversa, to be used as a standard in quantitative polymerase chain  
761 reactions for molecular pneumococcal serotyping. *FEMS Microbiol Lett* 364.

- 762 72. Sakai F, Chochua S, Satzke C, Dunne EM, Mulholland K, Klugman KP, Vidal JE. 2015. Single-  
763 plex quantitative assays for the detection and quantification of most pneumococcal  
764 serotypes. PLoS One 10:e0121064.
- 765 73. Tettelin H, Nelson KE, Paulsen IT, Eisen JA, Read TD, Peterson S, Heidelberg J, DeBoy RT, Haft  
766 DH, Dodson RJ, Durkin AS, Gwinn M, Kolonay JF, Nelson WC, Peterson JD, Umayam LA, White  
767 O, Salzberg SL, Lewis MR, Radune D, Holtzapple E, Khouri H, Wolf AM, Utterback TR, Hansen  
768 CL, McDonald LA, Feldblyum TV, Angiuoli S, Dickinson T, Hickey EK, Holt IE, Loftus BJ, Yang F,  
769 Smith HO, Venter JC, Dougherty BA, Morrison DA, Hollingshead SK, Fraser CM. 2001.  
770 Complete genome sequence of a virulent isolate of *Streptococcus pneumoniae*. Science  
771 293:498-506.
- 772 74. Lanie JA, Ng WL, Kazmierczak KM, Andrzejewski TM, Davidsen TM, Wayne KJ, Tettelin H,  
773 Glass JI, Winkler ME. 2007. Genome sequence of Avery's virulent serotype 2 strain D39 of  
774 *Streptococcus pneumoniae* and comparison with that of unencapsulated laboratory strain  
775 R6. J Bacteriol 189:38-51.
- 776 75. McDevitt E, Khan F, Scasny A, Thompson CD, Eichenbaum Z, McDaniel LS, Vidal JE. 2020.  
777 Hydrogen Peroxide Production by *Streptococcus pneumoniae* Results in Alpha-hemolysis by  
778 Oxidation of Oxy-hemoglobin to Met-hemoglobin. mSphere 5.
- 779 76. Moscoso M, Garcia E, Lopez R. 2006. Biofilm formation by *Streptococcus pneumoniae*: role  
780 of choline, extracellular DNA, and capsular polysaccharide in microbial accretion. J Bacteriol  
781 188:7785-95.
- 782 77. Andersson B, Dahmen J, Frejd T, Leffler H, Magnusson G, Noori G, Eden CS. 1983.  
783 Identification of an active disaccharide unit of a glycoconjugate receptor for pneumococci  
784 attaching to human pharyngeal epithelial cells. J Exp Med 158:559-70.
- 785 78. Schroeder MR, Lohsen S, Chancey ST, Stephens DS. 2019. High-Level Macrolide Resistance  
786 Due to the Mega Element [mef(E)/mel] in *Streptococcus pneumoniae*. Front Microbiol  
787 10:868.

788

789

790 **Table 1. Antimicrobial activity of DoC against streptococcal species.**

| Strain                                  | MIC <sub>90</sub> (mg/ml) <sup>*,#</sup> | 791 |
|-----------------------------------------|------------------------------------------|-----|
| <i>S. pneumoniae</i> ATCC BAA-255       | 0.25                                     | 792 |
| <i>S. australis</i> ATCC 700641         | >1                                       | 793 |
| <i>S. cristatus</i>                     | >0.5                                     |     |
| <i>S. infantis</i> ATCC 700779          | >0.5                                     | 794 |
| <i>S. intermedius</i> ATCC 27335        | >0.5                                     | 795 |
| <i>S. intestinalis</i> ATCC 43492       | >1                                       |     |
| <i>S. oligofermentus</i> CDC SS-1725    | >1                                       | 796 |
| <i>S. parasanguinis</i> ATCC 15912      | >0.5                                     |     |
| <i>S. peroris</i> ATCC 700780           | >0.5                                     | 797 |
| <i>S. pseudopneumoniae</i> ATCC BAA-960 | 0.5                                      | 798 |
| <i>S. salivarius</i> ATCC 7073          | 0.5                                      | 799 |
| <i>S. sanguinis</i> ATCC 10556          | >1                                       | 800 |
| <i>S. sinensis</i> CDC SS-1726          | >0.5                                     |     |
| <i>D. pilgrum</i>                       | >0.5                                     | 801 |
| <i>S. sobrinus</i> ATCC 33478           | >2                                       | 802 |

803 \*Strains were challenged with the MIC<sub>90</sub> for *S. pneumoniae* strains (0.5 mg/ml). #The limit of  
804 detection of this assay was 50 cfu/ml.

805

806

807

808

809

810

811

812

813

814

815

816

817

818

819

| Strain                                       | Description**                                                                                     | Reference or source                    | 820<br>821<br>822<br>823<br>824<br>825<br>826<br>827<br>828<br>829<br>830<br>831<br>832<br>833 | 820<br>821<br>822<br>823<br>824<br>825<br>826<br>827<br>828<br>829<br>830<br>831<br>832<br>833 | Table<br>2.<br>Pneumococcal strains used in this study. |
|----------------------------------------------|---------------------------------------------------------------------------------------------------|----------------------------------------|------------------------------------------------------------------------------------------------|------------------------------------------------------------------------------------------------|---------------------------------------------------------|
| TIGR4                                        | Invasive clinical isolate, capsular serotype 4, sensitive to antibiotics                          | (73)                                   |                                                                                                |                                                                                                |                                                         |
| D39                                          | Avery strain, clinical isolate, capsular serotype 2; sensitive to antibiotics                     | (74)                                   |                                                                                                |                                                                                                |                                                         |
| R6                                           | D39-derivative unencapsulated laboratory strain, sensitive to antibiotics                         | (74)                                   |                                                                                                |                                                                                                |                                                         |
| R6 $\Delta$ <i>spxB</i> $\Delta$ <i>lctO</i> | R6-derivative, hydrogen peroxide and autolysis deficient strain.                                  | (75)                                   |                                                                                                |                                                                                                |                                                         |
| R6 $\Delta$ <i>lytA</i> $\Delta$ <i>lytC</i> | R6-derivative, autolysis deficient strain.                                                        | (76)                                   |                                                                                                |                                                                                                |                                                         |
| EF3030                                       | Clinical isolate, capsular serotype 19F, sensitive to antibiotics                                 | (41, 77)                               |                                                                                                |                                                                                                |                                                         |
| <i>S. pneumoniae</i> ATCC49619               | Invasive reference strain, recommended by the CLSI* for antimicrobial sensitive test serotype 19F | American Type Culture Collection, (34) |                                                                                                |                                                                                                |                                                         |
| GA44288                                      | Clinical isolate, capsular serotype 19A; ERY, TET, AMX, CXM, CLI, SXT, MEM, PEN, CRO, CTX         | (78)                                   |                                                                                                |                                                                                                |                                                         |
| GA47281                                      | Clinical isolate, capsular serotype 19F; ERY, TET, AMX, CXM, CLI, SXT, MEM, PEN, CRO, CTX         | (78)                                   |                                                                                                |                                                                                                |                                                         |
| GA16833                                      | Clinical isolate, capsular serotype 19F; ERY,                                                     | (78)                                   |                                                                                                |                                                                                                |                                                         |



|         |                                                       |      |                          |                            |
|---------|-------------------------------------------------------|------|--------------------------|----------------------------|
|         | TET, CXM,                                             |      | 834                      | *CL                        |
| GA17227 | Clinical isolate, capsular serotype 23F; ERY,<br>TET, | (78) | 835<br>836<br>837<br>838 | SI,<br>clini<br>cal<br>and |

839 laboratory standards institute. \*\*Resistance to: amoxicillin (AMX), cefuroxime (CXM), ceftriaxone  
 840 (CRO), cefotaxime (CTX), clindamycin (CLI), erythromycin (ERY), meropenem (MEM), penicillin  
 841 (PEN), tetracycline (TET), trimethoprim-sulfamethoxazole (SXT)

842

843

844

845

Figure 1, Vidal et al

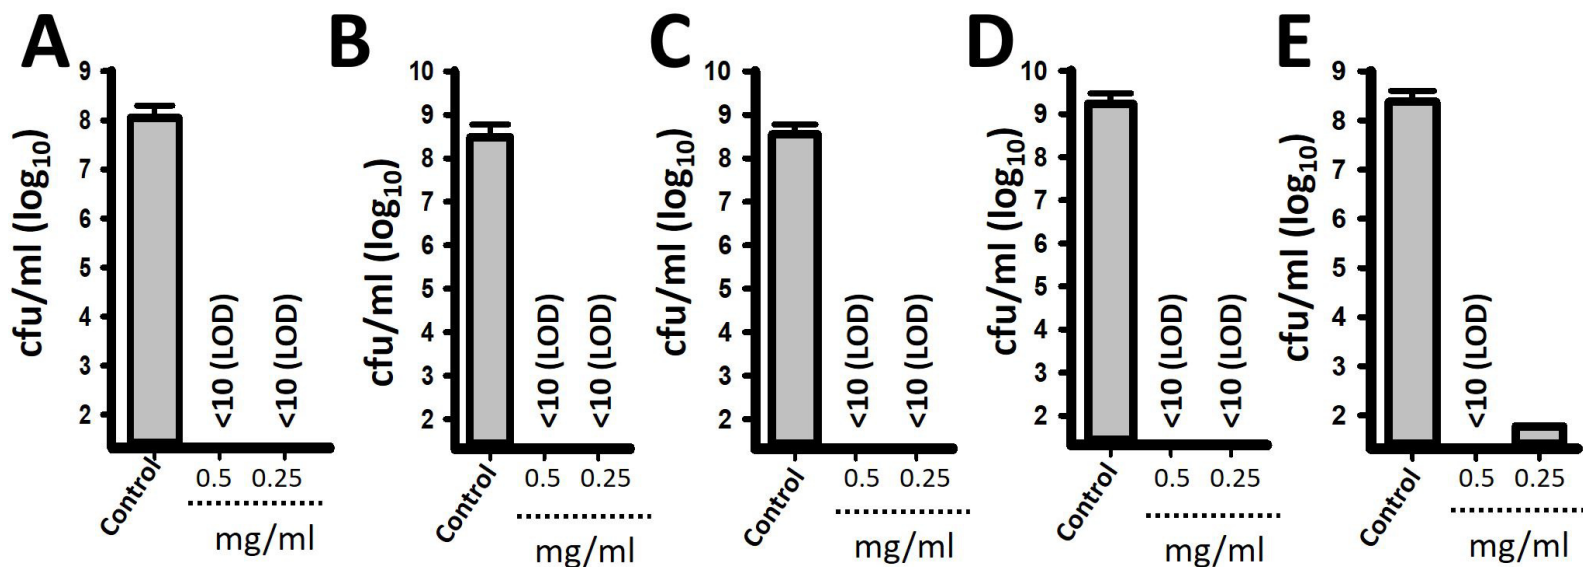

Figure 2, Vidal et al

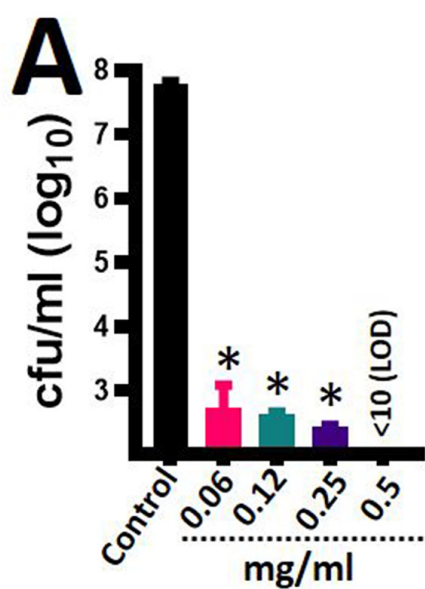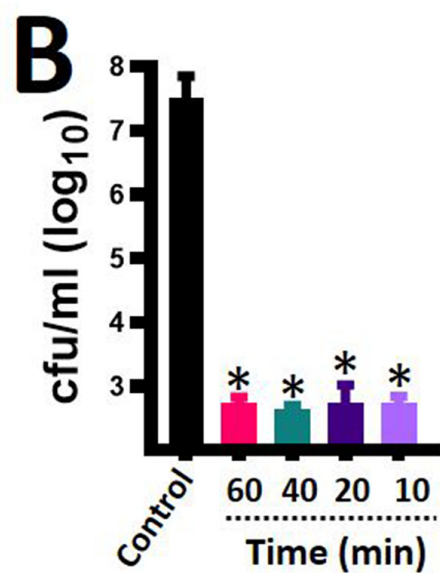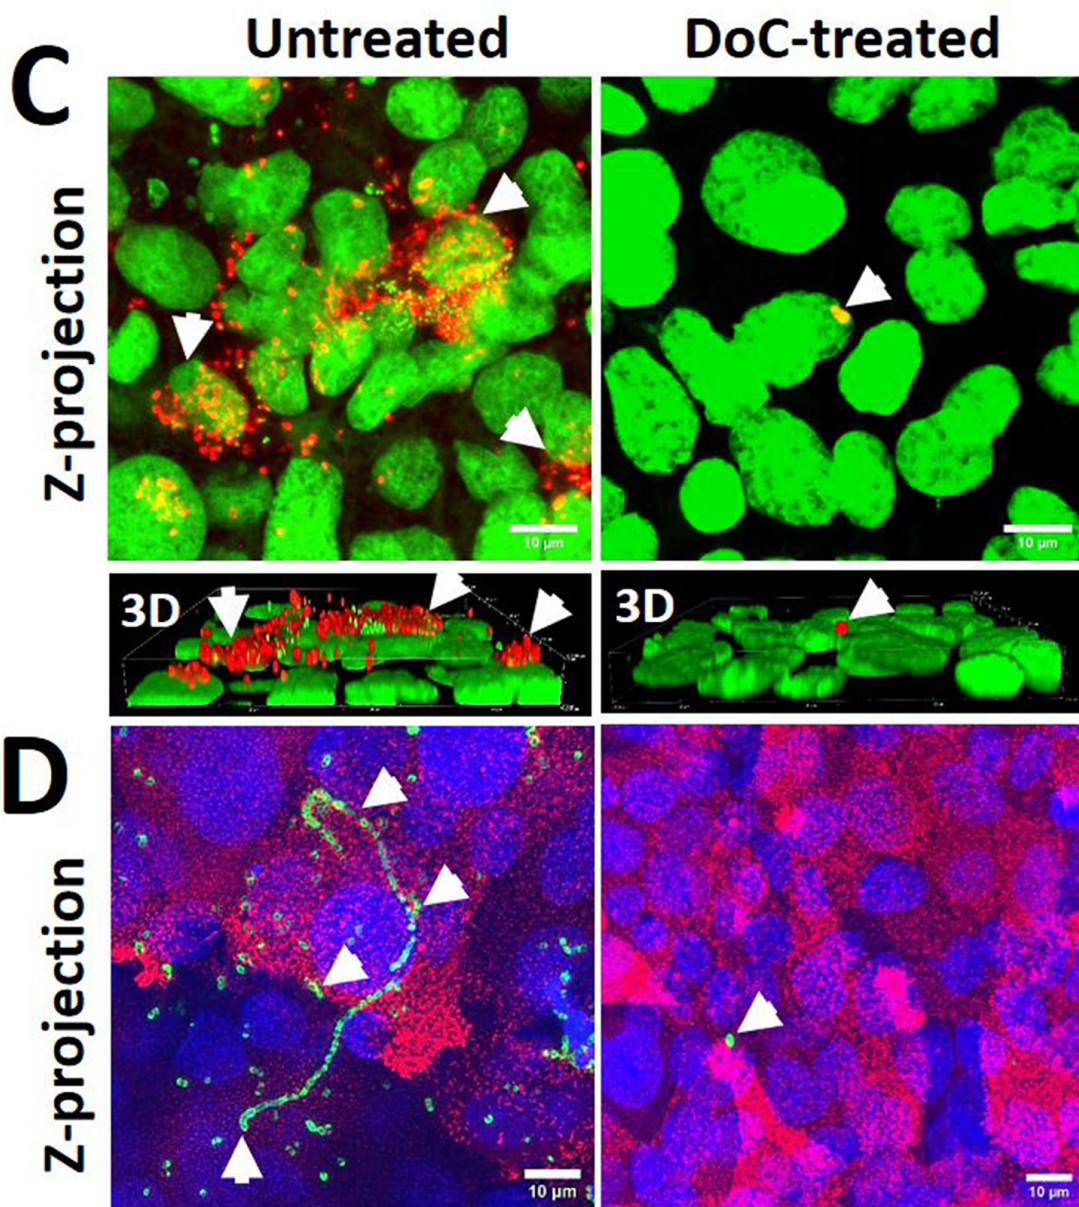

# Figure 3, Vidal et al

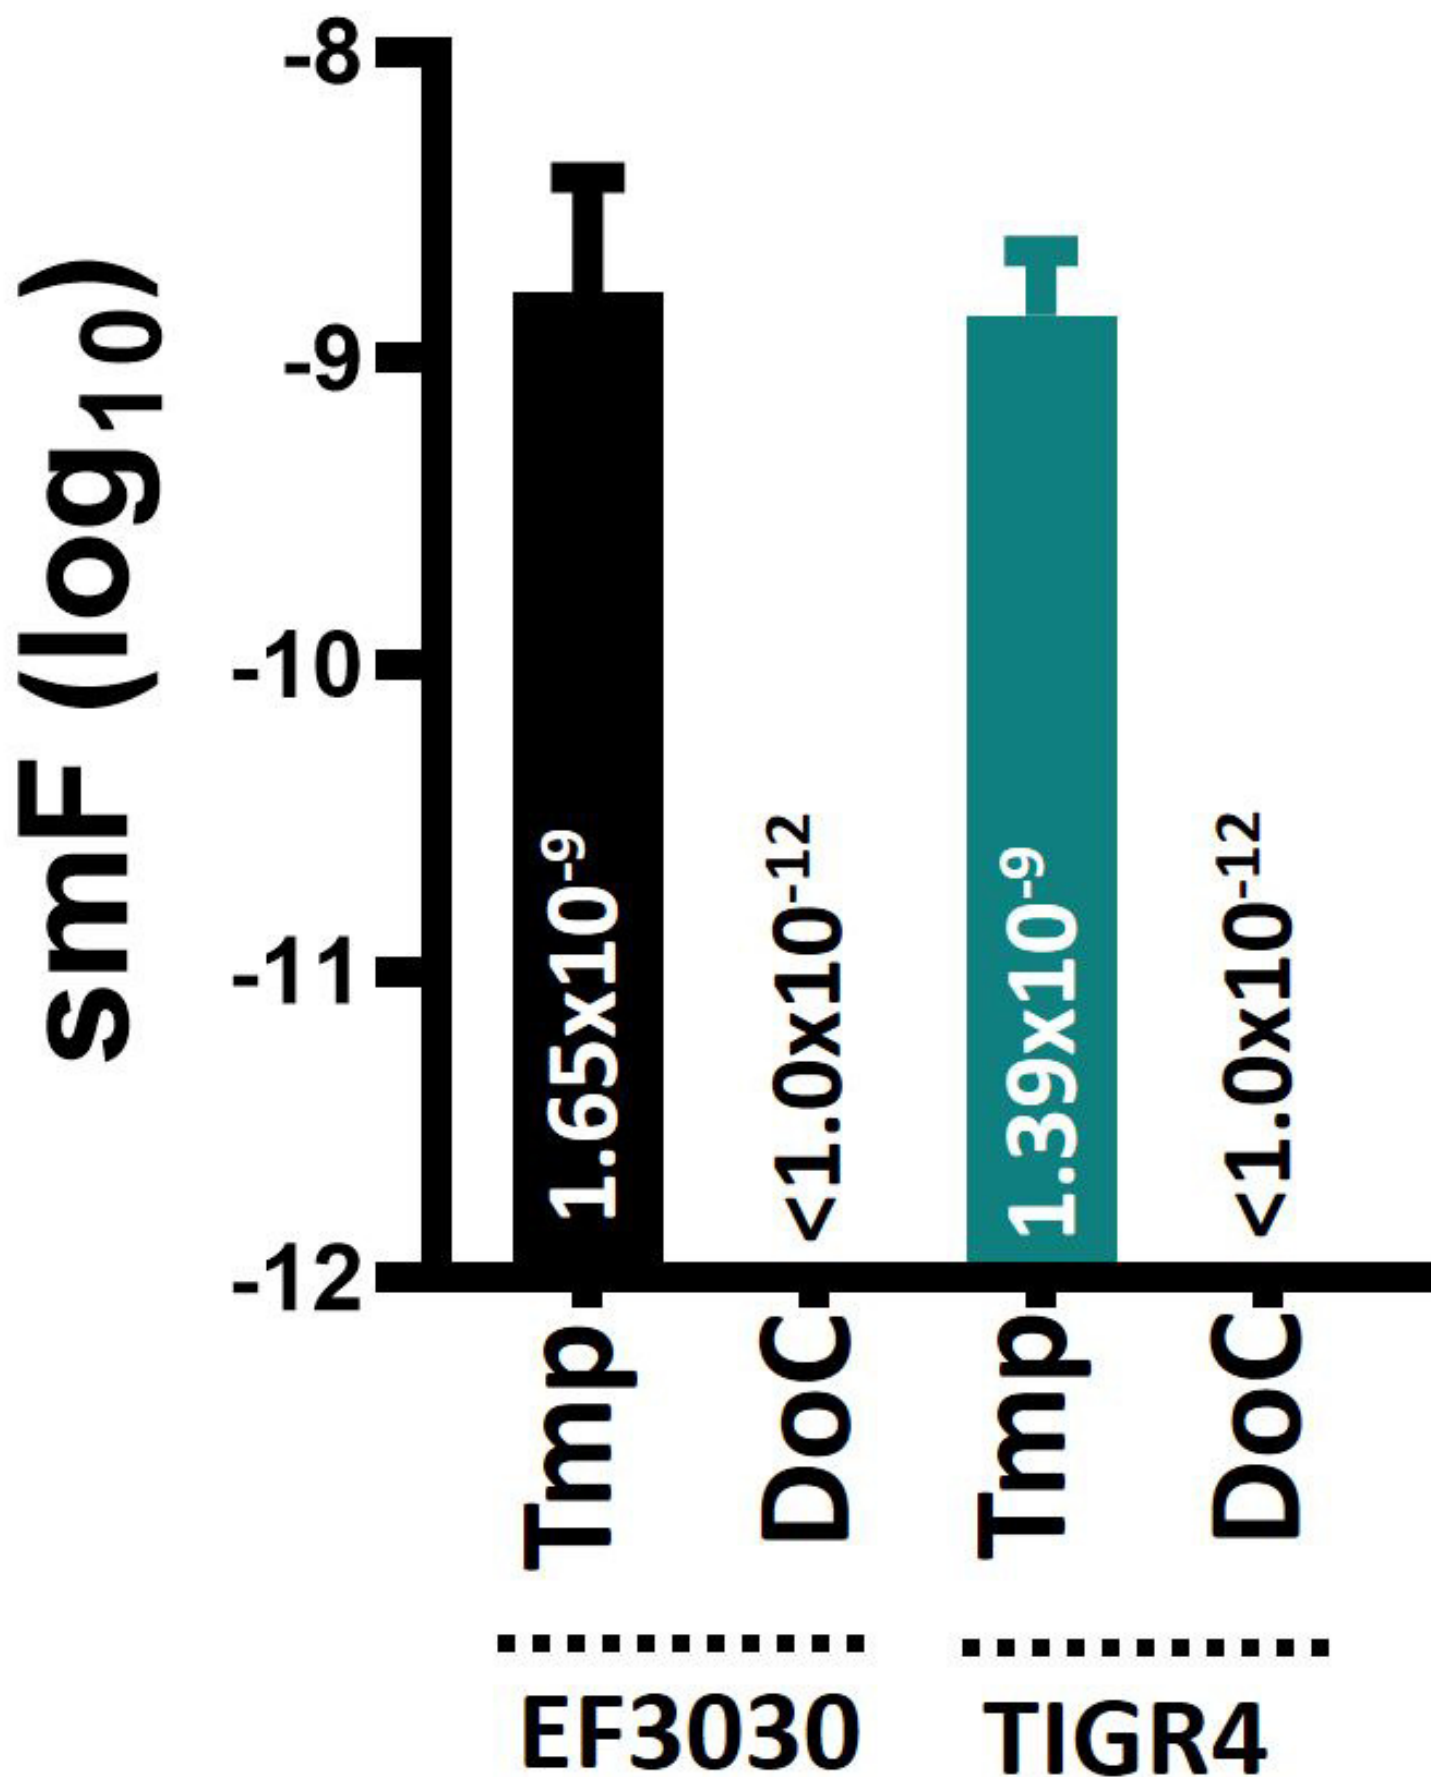

Figure 4, Vidal et al

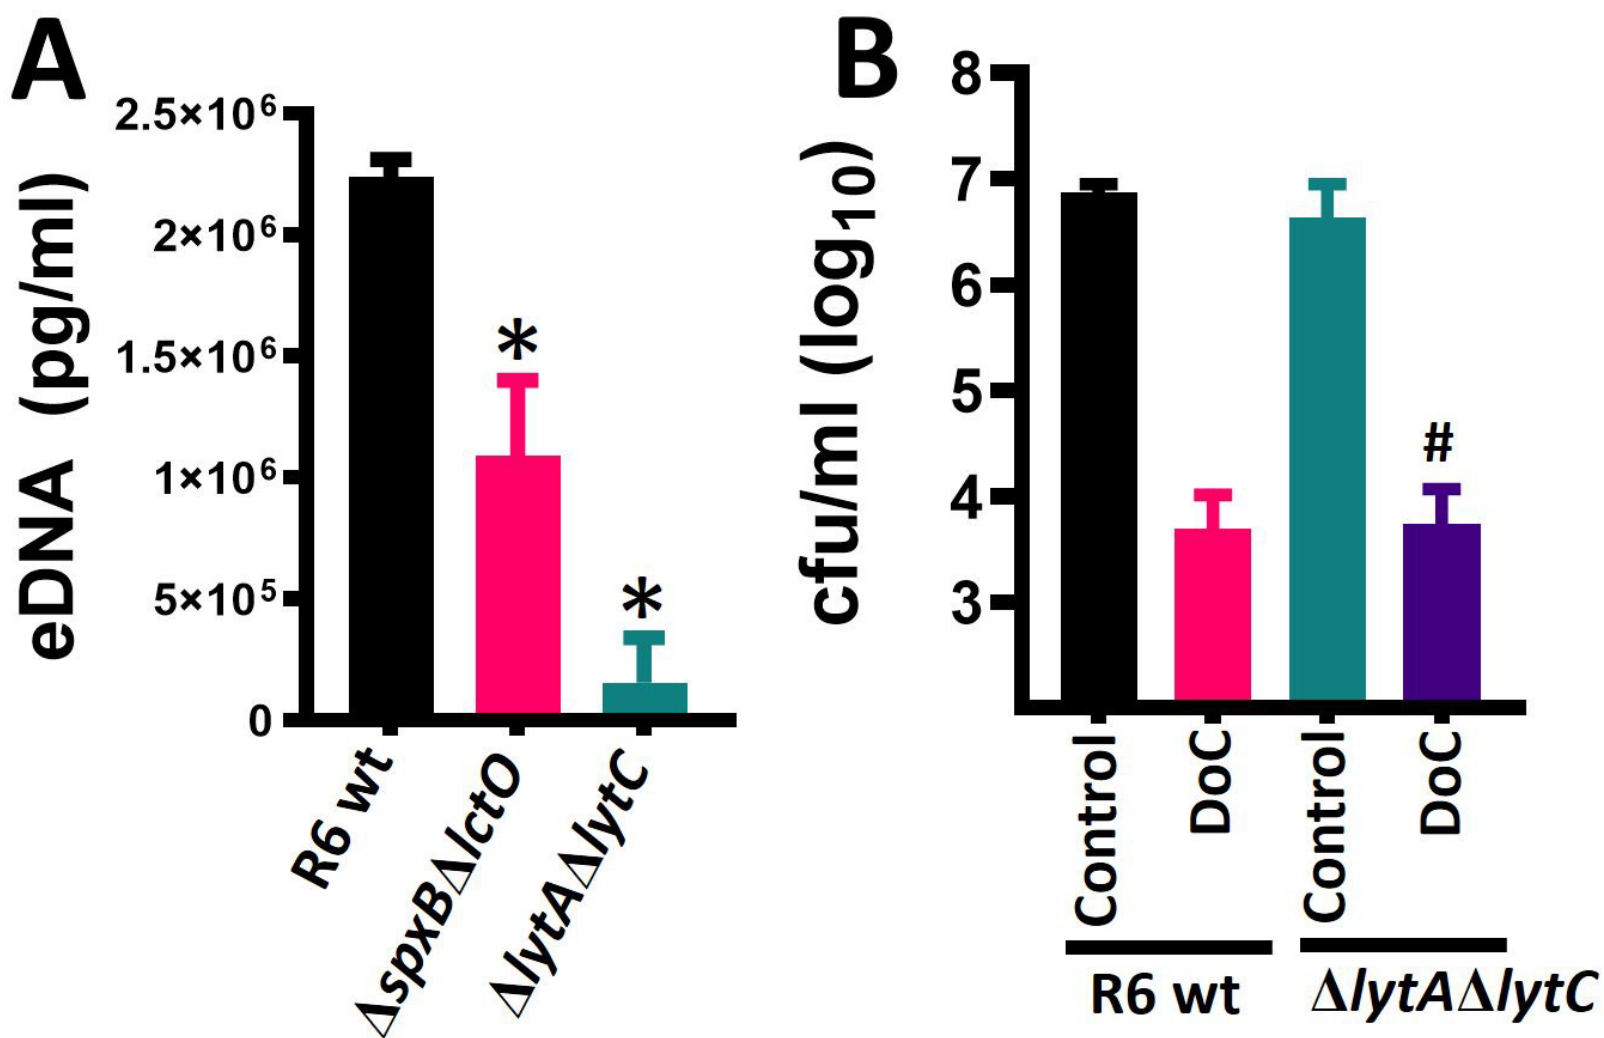

Figure 5, Vidal et al

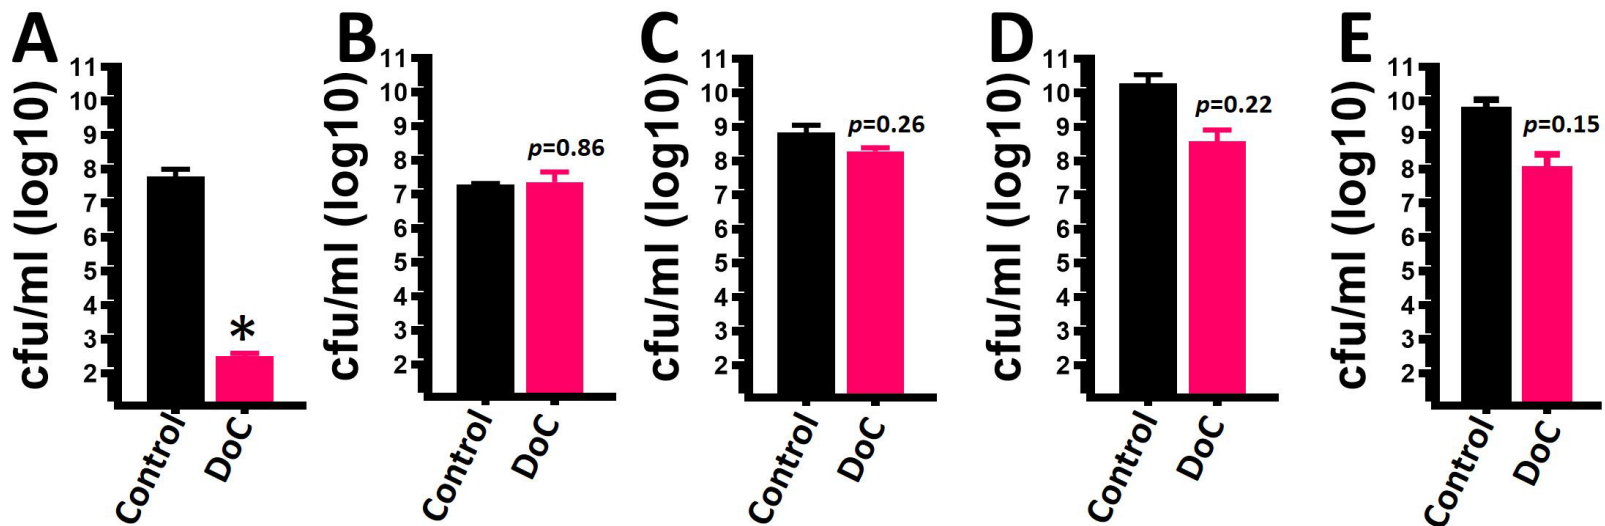

## Figure 6, Vidal et al

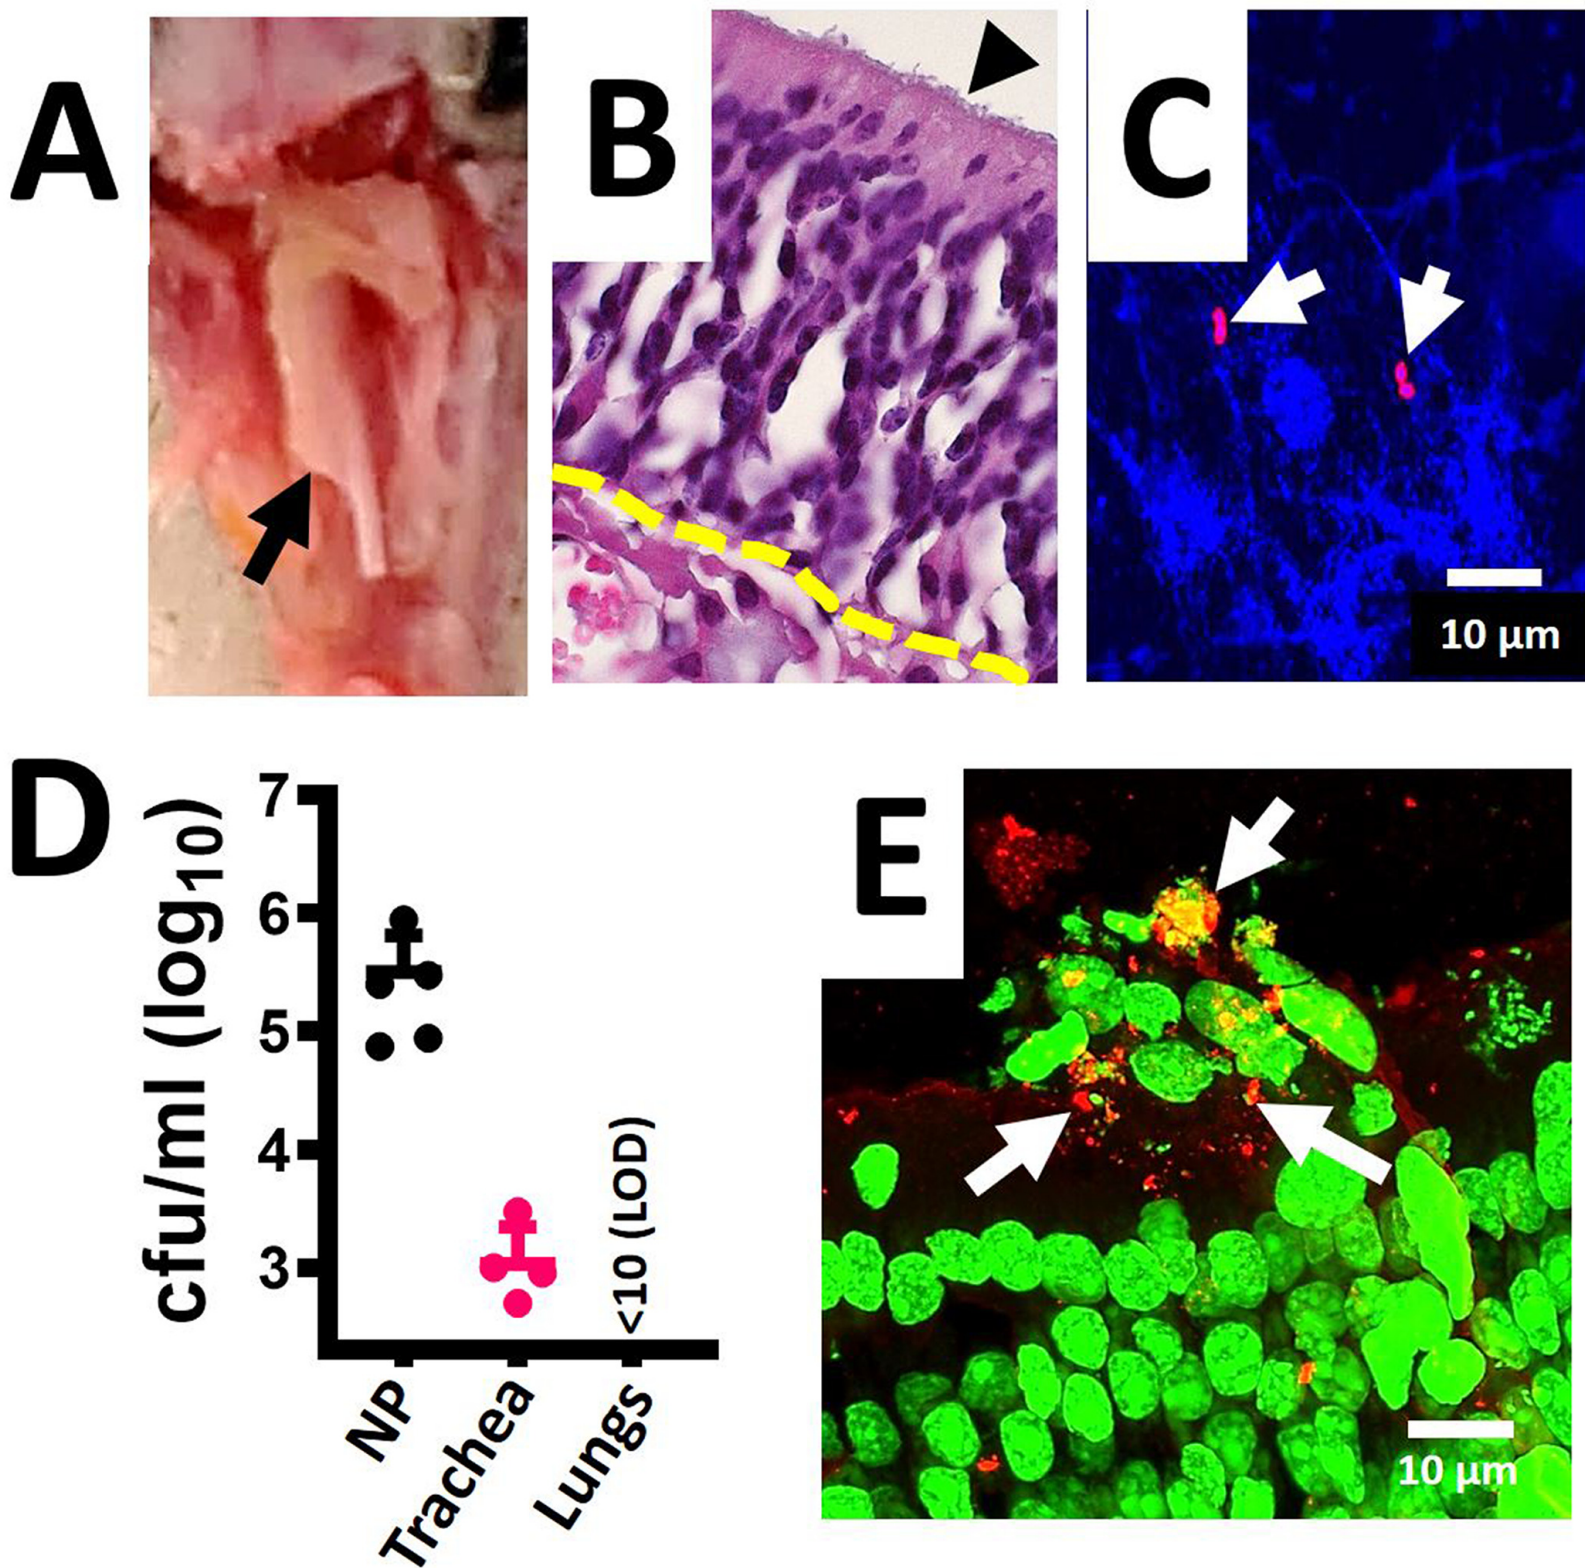

## Figure 7, Vidal et al

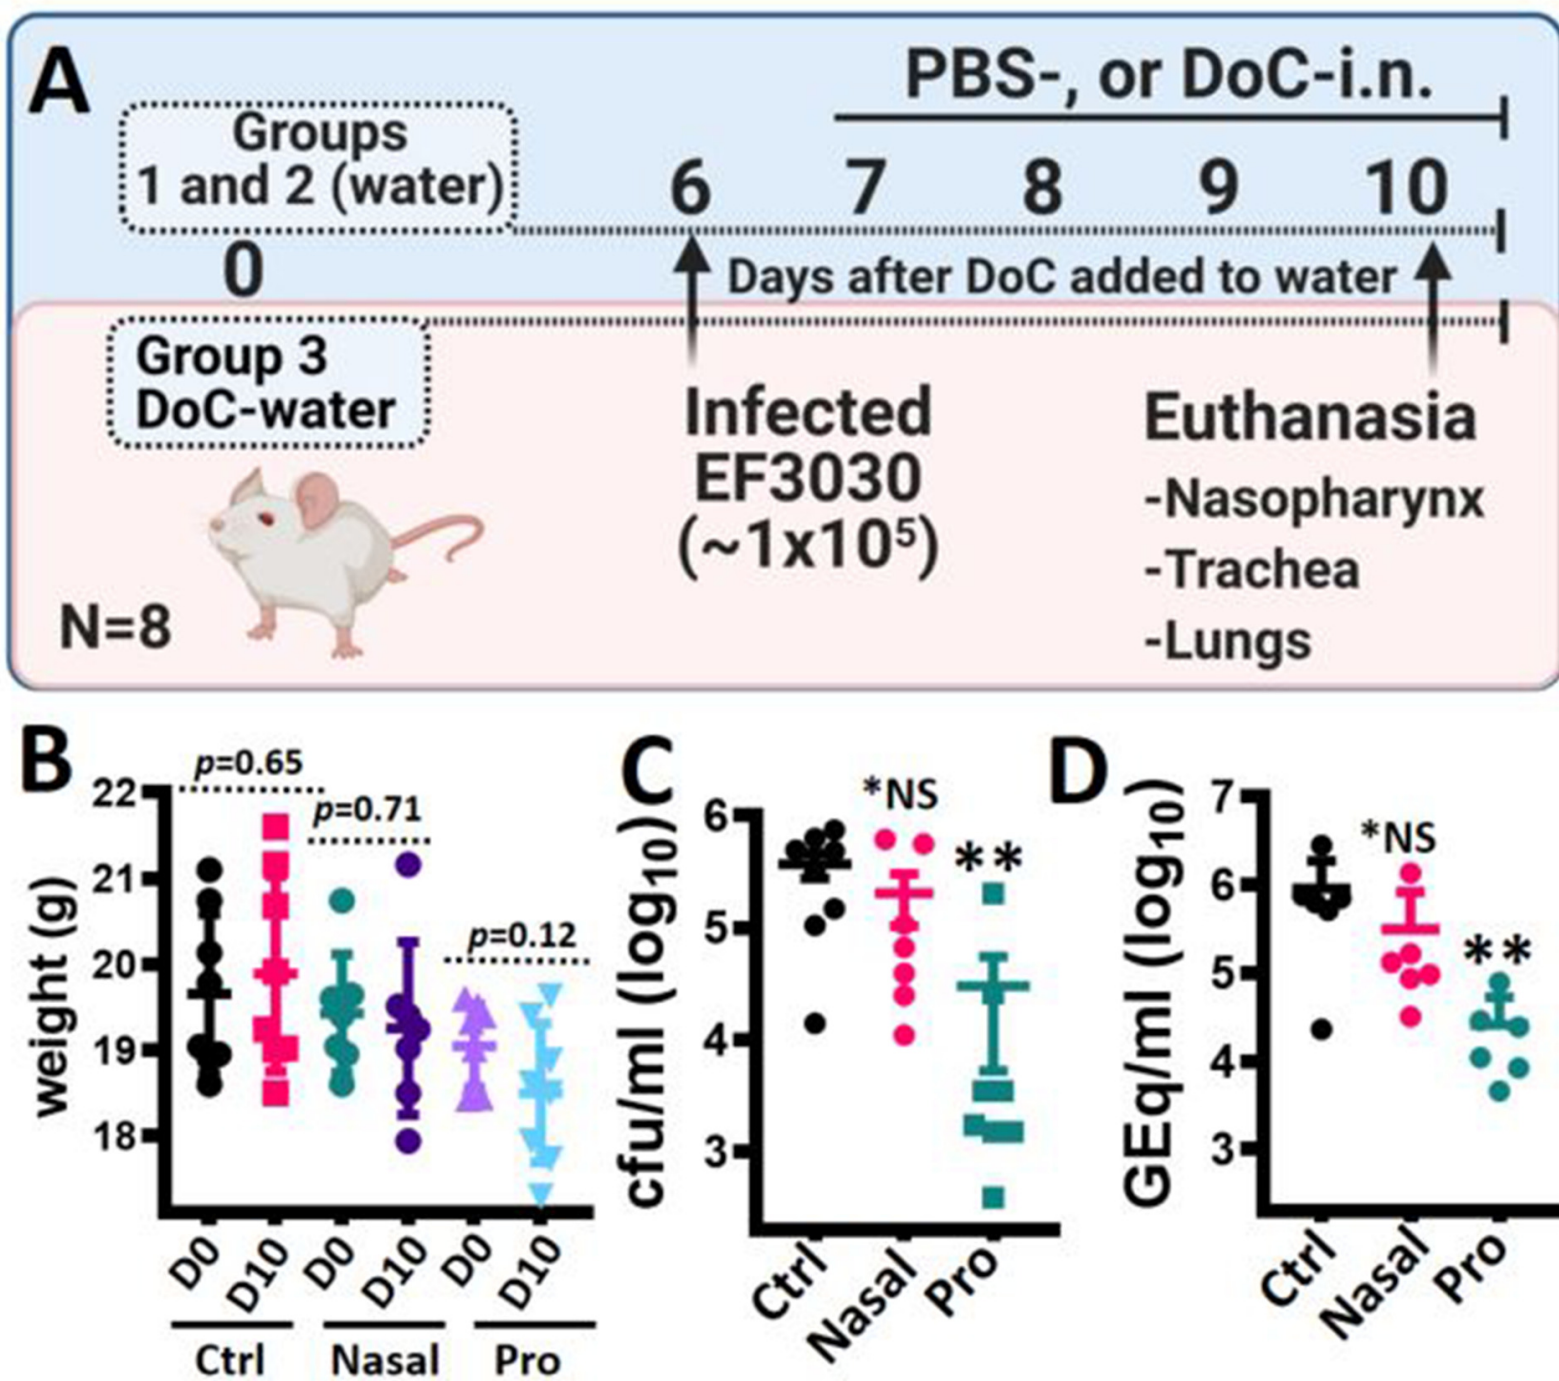

Source: http://biorxiv.org/content/10.1101/2021.05.17.444594v1.full.pdf
